# Supplementary material for: Correct regionalization of a tissue primordium is essential for coordinated morphogenesis
Source: eLife journal article supplement (doi:10.7554/elife.72369), 2021-11-01
Supplement: supp [file elife_poa_e72369_Figure_1_figure_supplement_1_source_data_1.xlsx]

## Sheet: B
Suppl Figure 1B	Number of cells panel 1C, 3G - near to the pit
	time (min)	number of cells
	-18.4	277
	-13.2	696
	-8	828
	-2.8	920
	2.4	934
	7.6	818
	12.8	576
	18	463
	23.2	314
	28.4	118
	33.6	74
	38.8	36
	44	15
	49.2	0
	54.4	0

## Sheet: B dash
Suppl Figure 1B'	Number of cells panel 1C, 3G -far from the pit
	time (min)	number of cells
	-18.4	521
	-13.2	1348
	-8	1571
	-2.8	1757
	2.4	1979
	7.6	1934
	12.8	1801
	18	1866
	23.2	1896
	28.4	1597
	33.6	1603
	38.8	1523
	44	1135
	49.2	916
	54.4	633
