# Supplementary material for: Correct regionalization of a tissue primordium is essential for coordinated morphogenesis
Source: eLife journal article supplement (doi:10.7554/elife.72369), 2021-11-01
Supplement: supp [file elife_poa_e72369_Figure_1_source_data_1.xlsx]

## Sheet: E
Figure 1E	Cumulative area change (pp per min)
	Time	far from pit	near pit
	-18.3	-0.00295203	-0.0158973
	-14.9	-0.0119775	-0.0599911
	-11.5	-0.024033	-0.0952453
	-8.1	-0.0348668	-0.132995
	-4.7	-0.0397944	-0.15932
	-1.3	-0.0432088	-0.206959
	2.1	-0.0322673	-0.24919
	5.5	-0.0150075	-0.289587
	8.9	-0.0100898	-0.344227
	12.3	-0.0268468	-0.429814
	15.7	-0.0386423	-0.456927
	19.1	-0.0605115	-0.506591
	22.5	-0.0785707	-0.584679
	25.9	-0.103082	-0.639829
	29.3	-0.151768	-0.710822
	32.7	-0.203204
	36.1	-0.256955
	39.5	-0.326766
	42.9	-0.371484
	46.3	-0.422208
	49.7	-0.50387
	53.1	-0.559853
	56.5	-0.603192
	59.9	-0.698276
	63.3	-0.777492
