# Supplementary material for: Correct regionalization of a tissue primordium is essential for coordinated morphogenesis
Source: eLife journal article supplement (doi:10.7554/elife.72369), 2021-11-01
Supplement: supp [file elife_poa_e72369_Figure_2_figure_supplement_1_source_data_1.xlsx]

## Sheet: A
Figure Supl 2A	Cycle length
	near the pit t=0	far from the pit, t=0	far from the pit t=55
	6.25	3.75	3.48
	3.75	6.25	8.12
	3.75	5	4.64
	7.5	3.75	9.86
	2.5	7.5	4.06
	5	7.5	4.06
	3.75	5	2.32
	6.25	5	2.32
	3.75	3.75	1.16
	3.75	3.75	2.9
	2.5	2.5	8.12
	3.75	3.75	4.64
	7.5	5	9.86
	5	2.5	4.06
	5	3.75	1.74
	6.25	5	2.32
	3.75	7.5	2.32
	5	3.75	1.16
	3.75	7.5	2.9
	3.75	3.75	4.64
	3.75	3.75	9.86
	2.5	5	2.32
	3.75	6.25	1.74
	3.75	5	2.32
	7.5	5	4.06
	5	3.75	1.74
	7.5	3.75	4.64
	5	10	9.86
	3.75	7.5	2.32
	7.5	2.5	1.74
	3.75	7.5	2.32
	6.25	3.75	4.06
	3.75	5	7.54
	5	5	1.74
	5	8.75	4.64
	6.25	3.75	9.86
	3.75	2.5	2.32
	7.5	6.25	4.06
	5	3.75	2.32
	6.25	2.5	4.06
	3.75	2.5	7.54
	3.75	3.75	1.74
	2.5	5	4.64
	7.5	3.75	9.86
	2.5	2.5	2.32
	5	5	4.06
	3.75	5	2.32
	2.5	5	4.06
	3.75	2.5	7.54
	3.75	5	1.74
	2.5	6.25	9.86
	3.75	6.25	4.06
	7.5	5	2.32
	2.5	6.25	4.06
	5	5	7.54
	6.25	2.5	3.48
	3.75	6.25	1.74
	3.75	2.5	9.86
	3.75	7.5	4.06
	3.75	7.5	2.32
	3.75	5	4.06
	2.5	5	7.54
	3.75	3.75	3.48
	3.75	3.75	1.74
	7.5	3.75	9.86
	5	3.75	4.06
	3.75	5	1.74
	2.5	2.5	4.06
	5	3.75	1.16
	7.5	5	7.54
	7.5	7.5	3.48
	3.75	3.75	2.9
	5	7.5	9.86
	3.75	6.25	4.06
	5	3.75	1.74
	5	2.5	2.9
	6.25	6.25	1.16
	3.75	5	7.54
	3.75	5	2.32
	7.5	3.75	3.48
	5	3.75	2.9
	1.16	10	9.86
	2.32	3.75	4.06
	1.16	2.5	1.74
	3.48	7.5	2.9
	1.74	3.75	4.06
	1.74	5	7.54
	4.06	5	2.32
	2.9	8.75	3.48
	3.48	3.75	3.87
	2.32	3.75	3.87
	1.16	6.25	6.45
	5.8	3.75	6.45
	2.32	7.5	3.87
	6.96	2.5	3.87
	2.32	3.75	5.16
	1.16	6.25	5.16
	2.32	3.75	3.87
	1.74	3.75	3.87
	3.48	5	3.87
	2.9	5	2.58
	2.32	5	3.87
	1.74	2.5	3.87
	10.44	5	5.16
	1.74	6.25	5.16
	3.48	2.5	3.87
	1.74	5	2.58
	2.32	6.25	3.87
	2.32	4.06	2.58
	5.22	9.86	5.16
	1.74	1.74	3.87
	2.32	4.64	2.58
	1.16	1.74	5.16
	3.48	11.02	5.16
	1.74	2.32	3.87
	4.06	2.32	3.87
	2.9	3.48	2.58
	3.48	5.22	5.16
	2.32	1.74	5.16
	1.16	1.74	3.87
	1.16	14.5	2.58
	2.32	5.8	5.16
	6.96	2.9	5.16
	2.32	1.16	3.87
	2.9	4.06	9.03
	2.32	1.74	5.16
	1.16	2.9	5.16
	3.48	4.64	5.16
	2.9	1.74	5.16
	2.32	2.32	2.58
	2.9	10.44	3.87
	10.44	5.22	3.87
	1.74	2.9	3.87
	3.48	1.74	9.03
	2.32	9.28
	1.74	5.22
	1.16	2.32
	5.22	3.48
	5.16	9.28
	3.87	6.38
	9.03	3.48
	3.87	4.06
	9.03	6.38
	5.16	4.06
	3.87	4.06
	9.03	2.32
	7.74	4.06
	3.87	6.96
		2.9
		5.8
		1.74
		4.64
		3.48
		3.48
		2.32
		7.54
		2.9
		4.06
		4.06
		2.9
		4.06
		2.9
		8.7
		2.9
		4.64
		1.16
		4.06
		8.7
		8.7
		2.9
		9.28
		2.32
		4.06
		4.06
		6.96
		9.86
		1.74
		1.16
		6.38
		2.9
		4.06
		9.86
		8.12
		4.64
		6.38
		11.02
		2.32
		2.32
		3.48
		5.22
		2.32
		12.76
		14.5
		2.9
		1.16
		4.06
		1.16
		2.9
		4.64
		1.74
		2.32
		10.44
		5.22
		2.9
		6.38
		9.28
		5.22
		2.32
		3.48
		9.28
		6.38
		1.74
		3.48
		4.06
		6.38
		4.06
		13.92
		2.32
		4.06
		6.96
		2.9
		5.8
		5.22
		4.64
		3.48
		3.48
		7.54
		2.9
		2.32
		4.06
		2.9
		4.06
		2.9
		8.7
		2.9
		4.64
		3.48
		1.74
		1.74
		8.7
		2.9
		9.28
		2.32
		2.32
		1.74
		6.96
		9.86
		1.74
		1.16
		6.38
		1.16
		3.87
		9.03
		7.74
		5.16
		9.03
		6.45
		11.61
		7.74
		9.03
		7.74
		2.58
		5.16
		3.87
		7.74
		6.45
		2.58
		3.87
		10.32
		9.03
		2.58
		6.45
		12.9
		6.45
		3.87
		6.45
		3.87
		9.03
		7.74
		5.16
		9.03
		6.45
		11.61
		7.74
		9.03
		7.74
		5.16
		3.87
		7.74
		6.45
		2.58
		3.87
		2.58
		10.32
		9.03
		2.58
		5.16
		12.9
		2.58
		5.16
		3.87
		6.45

## Sheet: C
Figure Supl 2C	Amplitude
	Radial distance	Amplitude (mean)	standar error of the mean low boundary	standar error of the mean upper boundary
	1.6068	15.6647	14.5717	16.7578
	4.8204	13.0114	11.5803	14.4425
	8.034	11.7829	10.6208	12.9451
	11.2476	9.70716	8.70685	10.7075
	14.4612	9.14608	8.11514	10.177
	17.6748	9.24284	8.5586	9.92709
	20.8884	7.75066	7.22106	8.28027
	24.102	6.7222	6.39945	7.04495
	27.3156	7.51851	6.99234	8.04468
	30.5292	7.27717	6.56131	7.99304
	33.7428	7.50158	6.58769	8.41547
	36.9564	6.08164	5.72199	6.44129
	40.17	6.60345	5.78929	7.41761
	43.3836	6.05624	4.83149	7.281
