# Supplementary material for: Correct regionalization of a tissue primordium is essential for coordinated morphogenesis
Source: eLife journal article supplement (doi:10.7554/elife.72369), 2021-11-01
Supplement: supp [file elife_poa_e72369_Figure_2_source_data_1.xlsx]

## Sheet: F
Figure 2F	Cycle length
	time[min]	nearpit cycle lenght	farpitcycle lenght
	0	0	0
	2	0.335616	0.218391
	4	0.342466	0.224138
	6	0.19863	0.232759
	8	0.0890411	0.132184
	10	0.0342466	0.103448
	12	0	0.045977
	14	0	0.0229885
	16	0	0.00574713
	18	0	0
	20	0	0.00574713
	22	0	0
	24	0	0.00287356
	26	0	0
	28	0	0
	30	0	0.00574713
	32	0	0

## Sheet: G
Figure 2G	Amplitude x frequency in radial stripes
	Radial distance	Amplitude x frequency (mean)	standar error of the mean low boundary	standar error of the mean upper boundary
	1.14771	6.82664	6.20044	7.45284
	3.44314	7.03703	6.69192	7.38215
	5.73857	6.76256	6.3556	7.16952
	8.034	5.87704	5.58334	6.17075
	10.3294	5.71122	5.40105	6.02138
	12.6249	4.61557	4.4487	4.78244
	14.9203	4.99348	4.71202	5.27493
	17.2157	4.59689	4.37733	4.81644
	19.5111	4.22002	4.06901	4.37103
	21.8066	4.57206	4.41484	4.72928
	24.102	3.65754	3.5501	3.76498
	26.3974	3.70918	3.58272	3.83564
	28.6929	3.171	3.07837	3.26363
	30.9883	2.57665	2.472	2.68129
	33.2837	1.97293	1.90062	2.04524
	35.5791	2.26266	2.18556	2.33976
	37.8746	2.51376	2.40929	2.61824
	40.17	2.72394	2.60304	2.84485
	42.4653	1.95171	1.82673	2.0767
	44.761	1.68845	1.5569	1.81999
	47.0563	1.37724	1.2512	1.50327

## Sheet: H
Figure 2H	Amplitude x frequency
	near the pit t=0	far from the pit, t=0	far from the pit t=55
	0.741684	1.5355	3.04584
	2.73452	0.562661	1.27412
	3.39726	0.844005	1.84057
	0.650008	0.878222	0.772304
	1.89005	0.40318	1.56907
	0.406585	0.752576	1.83094
	1.20456	0.861805	3.09894
	2.43245	2.10818	3.00529
	0.690284	0.814062	11.0674
	1.25774	1.14318	3.19496
	6.92511	1.8209	1.27412
	5.62323	1.6087	1.84057
	0.519191	0.904547	0.772304
	3.88981	2.23231	1.56907
	2.93999	2.40076	10.6312
	0.600087	0.894289	3.09894
	4.04435	0.471963	3.00529
	2.15408	0.814146	11.0674
	1.7247	0.644507	3.19496
	1.33813	0.661029	1.84057
	1.53598	0.825109	0.772304
	3.78305	0.474823	5.96151
	2.1414	0.400926	10.6312
	2.23839	1.13024	3.00529
	0.522071	0.563393	2.46214
	1.01199	0.799062	4.23717
	0.495227	2.25237	1.84057
	1.42586	0.884499	0.772304
	0.794529	0.586218	5.96151
	0.758998	3.76421	10.6312
	0.940046	0.464379	3.00529
	0.620413	1.01168	2.46214
	2.00481	0.442879	1.27372
	2.14065	1.62901	4.23717
	0.860268	0.486814	1.84057
	1.58449	1.56427	0.772304
	3.5551	2.03038	5.96151
	0.89186	0.856011	7.08764
	1.28225	1.01013	4.46078
	0.741684	1.16405	2.46214
	2.7928	1.21183	1.27372
	3.39726	0.719305	4.23717
	2.44771	1.75721	1.84057
	0.650008	1.41809	0.772304
	1.89005	1.23258	5.96151
	1.69902	1.34899	7.08764
	0.826753	1.68223	4.46078
	3.63051	1.02749	2.46214
	0.690284	2.11285	1.27372
	1.25774	2.05636	7.23082
	6.92511	0.985151	0.772304
	3.50202	0.43829	7.08764
	0.519191	1.03307	4.46078
	4.05024	0.967983	2.46214
	2.93999	0.676073	1.27372
	0.600087	1.85785	2.88265
	4.04435	0.562661	7.23082
	1.85029	1.77793	0.772304
	1.7247	0.40318	7.08764
	1.65158	0.752576	4.46078
	1.53598	0.861805	2.46214
	3.78305	2.10818	1.27372
	2.1414	0.814062	2.88265
	2.23839	0.973363	7.23082
	0.522071	1.12519	0.772304
	1.01199	1.6087	7.08764
	0.992762	0.904547	5.5756
	3.54376	2.23231	2.46214
	1.42586	2.40076	17.1529
	0.990887	0.894289	1.27372
	0.758998	0.471963	2.88265
	2.13344	0.814146	4.04684
	2.01501	0.644507	0.772304
	2.00481	0.529368	7.08764
	2.14065	0.825109	5.5756
	0.860268	1.86639	2.07374
	1.58449	0.400926	17.1529
	4.44005	1.13024	1.27372
	3.5551	0.563393	6.96134
	0.89186	0.799062	2.88265
	1.28225	2.25237	4.04684
	8.56788	0.884499	0.772304
	8.14861	1.37133	7.08764
	9.80379	1.27388	5.5756
	2.54667	0.464379	2.07374
	11.043	1.01168	4.01916
	6.54546	0.754218	1.27372
	3.04238	1.62901	6.96134
	3.78514	0.486814	2.88265
	3.88758	1.56427	3.22914
	11.7377	2.42531	1.4479
	8.68733	0.856011	0.634794
	2.51598	1.01013	0.693449
	13.7706	0.563606	4.05061
	1.84793	1.21183	1.47096
	4.55418	0.719305	1.45823
	15.9305	1.25659	1.49919
	9.0247	1.41809	1.53435
	3.84272	1.23299	3.22914
	5.33724	1.34899	1.4479
	9.30608	1.68223	2.08514
	8.38519	1.02749	2.23785
	8.62141	2.11285	1.47096
	0.724109	2.05636	1.45823
	9.79108	0.985151	1.49919
	7.62853	1.41999	1.53435
	3.82781	1.03307	2.69539
	3.39325	0.967983	1.4479
	3.78895	4.28551	2.08514
	2.82082	0.943299	1.58742
	9.33639	3.7724	2.23785
	8.14861	1.61801	2.06827
	9.80379	5.54803	1.45823
	2.54667	0.566485	1.49919
	8.93774	3.53916	1.19436
	3.04238	4.83383	1.53435
	3.78514	3.35788	2.69539
	3.88758	1.65086	2.44532
	11.7377	4.49495	1.58742
	14.8412	14.279	2.23785
	7.4505	0.49963	2.06827
	13.7706	1.43734	1.45823
	1.84793	3.03912	1.49919
	4.55418	14.8682	1.19436
	5.24577	4.60747	0.608407
	9.0247	8.01834	1.68099
	32.9511	5.15436	2.44532
	5.33724	1.11932	1.58742
	9.30608	5.36862	1.05086
	8.38519	3.21323	4.0377
	5.08394	0.514133	2.21658
	0.724109	1.39233	1.79506
	9.79108	7.62057	1.19436
	7.62853	3.68752	0.608407
	3.10003	0.556335
	7.23598	1.3431
	4.93716	5.35861
	2.82082	4.20875
	1.23806	1.16805
	2.11014	1.36118
	0.715449	2.19441
	1.41084	1.56835
	0.640716	1.02277
	1.23806	1.83784
	2.11014	2.3219
	0.715449	5.27483
	1.27218	2.55454
	3.07439	1.35591
		2.89173
		1.51473
		3.73817
		1.41382
		2.28339
		4.79175
		2.32609
		1.13671
		4.59541
		1.78036
		3.30639
		2.37527
		2.50375
		2.42007
		0.912192
		2.60888
		2.06614
		10.6461
		1.53707
		0.644494
		0.722497
		3.17606
		1.10752
		3.60136
		2.93858
		1.44155
		1.21787
		0.645775
		5.76893
		6.09687
		0.895611
		3.57409
		4.28551
		0.943299
		0.742678
		1.61801
		1.22214
		0.566485
		3.53916
		4.83383
		3.35788
		1.65086
		3.31433
		0.978588
		0.49963
		3.03912
		14.8682
		4.60747
		9.0228
		5.15436
		1.11932
		5.36862
		3.21323
		0.514133
		1.39233
		7.62057
		1.17803
		0.556335
		1.3431
		5.35861
		4.20875
		1.16805
		1.36118
		4.374
		2.19441
		1.56835
		1.02277
		1.83784
		0.965582
		5.27483
		2.55454
		1.35591
		2.89173
		1.51473
		1.1534
		1.41382
		2.28339
		4.79175
		1.13671
		4.59541
		4.86565
		3.30639
		2.37527
		2.50375
		2.42007
		0.912192
		2.60888
		2.06614
		3.33253
		4.20155
		3.19516
		0.722497
		3.17606
		1.10752
		3.60136
		6.15293
		7.45133
		1.21787
		0.645775
		5.76893
		6.09687
		0.895611
		15.4847
		1.27696
		0.459105
		0.923092
		2.66797
		0.470387
		0.625246
		0.688707
		0.670982
		0.700398
		0.775746
		1.64045
		1.08071
		2.71581
		0.755058
		1.20235
		1.6856
		0.941496
		0.694544
		0.452227
		2.1561
		1.69176
		0.437293
		0.89672
		1.36359
		0.620954
		1.27696
		0.459105
		0.923092
		2.66797
		0.470387
		0.625246
		0.688707
		0.670982
		0.700398
		0.775746
		1.08071
		2.71581
		0.755058
		0.704286
		1.6856
		0.941496
		1.97913
		0.694544
		0.452227
		2.1561
		1.47789
		0.437293
		1.88769
		1.11934
		1.36359
		0.620954
