# Supplementary material for: Correct regionalization of a tissue primordium is essential for coordinated morphogenesis
Source: eLife journal article supplement (doi:10.7554/elife.72369), 2021-11-01
Supplement: supp [file elife_poa_e72369_Figure_3_figure_supplement_1_source_data_1.xlsx]

## Sheet: A
Suppl Figure 3-1A		Number of cells hkb mutant for panel Figure 3H
	hkb
	time	Number of cells
	-18.3	603
	-14.9	911
	-11.5	1109
	-8.1	1134
	-4.7	1391
	-1.3	1309
	2.1	1174
	5.5	1156
	8.9	1124
	12.3	1117
	15.7	1013
	19.1	1210
	22.5	1191
	25.9	985
	29.3	1092
	32.7	1143
	36.1	973
	39.5	1001
	42.9	918
	46.3	720
	49.7	717
	53.1	575
	56.5	580
	59.9	528
	63.3	388

## Sheet: D
Suppl Figure 3-1D		Number of cells wild-type for panel Figure 4A-B', D,E
	WT	Cells near the pit			WT	Cells far from the pit
	time	N			time	N
	-13.5	134			-13.5	205
	-10.5	128			-10.5	218
	-7.5	164			-7.5	301
	-4.5	175			-4.5	348
	-1.5	124			-1.5	196
	1.5	129			1.5	284
	4.5	163			4.5	344
	7.5	149			7.5	336
	10.5	183			10.5	394
	13.5	165			13.5	373
	16.5	160			16.5	346
	19.5	139			19.5	317
	22.5	64			22.5	240
	25.5				25.5	335
	28.5				28.5	338
	31.5				31.5	330
	34.5				34.5	326
	37.5				37.5	309
	40.5				40.5	269
	43.5				43.5	189
	46.5				46.5	154
	49.5				49.5	229
	52.5				52.5	128
	55.5				55.5	215

## Sheet: E
Suppl Figure 3-1E		Number of cells hkb mutant for panel Figure 4A-B',D,E
	hkb	Cells near the pit			hkb	Cells far from the pit
	time	N			time	N
	-13.2143	185			-13.2143	306
	-9.64286	180			-9.64286	337
	-6.07143	238			-6.07143	465
	-2.5	226			-2.5	476
	1.07143	196			1.07143	427
	4.64286	264			4.64286	541
	8.21429	210			8.21429	503
	11.7857	226			11.7857	488
	15.3571	192			15.3571	436
	18.9286	206			18.9286	517
	22.5	208			22.5	496
	26.0714	171			26.0714	426
	29.6429	227			29.6429	583
	33.2143	190			33.2143	484
	36.7857	155			36.7857	474
	40.3571	209			40.3571	504
	43.9286	119			43.9286	346
	47.5	82			47.5	283
	51.0714	81			51.0714	271
	54.6429	66			54.6429	270
	58.2143	62			58.2143	270

## Sheet: F
Suppl Figure 3-1F		Number of cells wild-type, panels 4D,E
	WT
	time	Total T1 circum	T1 circum nearpit	T1 circum farpit	Total T1 radial	T1 radial nearpit	T1 radial farpit
	-16.5	2	0	2	4	2	2
	-13.5	13	6	7	16	5	11
	-10.5	23	9	14	18	7	11
	-7.5	28	8	20	12	3	9
	-4.5	42	18	24	18	8	10
	-1.5	30	10	20	17	9	8
	1.5	37	14	23	24	9	15
	4.5	32	12	20	19	9	10
	7.5	40	16	24	12	8	4
	10.5	36	8	28	23	11	12
	13.5	27	10	17	16	4	12
	16.5	24	3	21	8	0	8
	19.5	10	1	9	13	4	9
	22.5	14	2	12	4	1	3
	25.5	10	0	10	12	1	11
	28.5	9	0	9	7	0	7
	31.5	7	0	7	2	0	2
	34.5	12	0	12	6	0	6
	37.5	10	0	10	4	0	4
	40.5	3	0	3	3	0	3
	43.5	7	0	7	4	0	4
	46.5	4	0	4	3	0	3
	49.5	5	0	5	3	0	3
	52.5	5	0	5	3	0	3
	55.5	3	0	3	3	0	3
	58.5	1	0	1	1	0	1
	61.5	4	0	4	2	0	2

## Sheet: G
Suppl Figure 3-1G		Number of cells hkb mutant, panels 4D,E
	hkb
	time	Total T1 circum	T1 circum nearpit	T1 circum farpit	Total T1 radial	T1 radial nearpit	T1 radial farpit
	-16.5	3	1	2	4	1	3
	-13.5	3	2	1	6	3	3
	-10.5	6	5	1	6	5	1
	-7.5	14	4	10	12	7	5
	-4.5	11	2	9	7	4	3
	-1.5	6	4	2	4	1	3
	1.5	17	6	11	13	7	6
	4.5	6	1	5	8	5	3
	7.5	12	7	5	13	5	8
	10.5	11	6	5	5	3	2
	13.5	16	6	10	10	4	6
	16.5	11	6	5	8	4	4
	19.5	21	8	13	13	9	4
	22.5	9	5	4	12	4	8
	25.5	13	4	9	13	6	7
	28.5	12	6	6	10	7	3
	31.5	12	3	9	17	8	9
	34.5	12	4	8	9	3	6
	37.5	12	7	5	8	4	4
	40.5	8	3	5	8	3	5
	43.5	5	1	4	5	1	4
	46.5	5	3	2	5	3	2
	49.5	9	4	5	8	3	5
	52.5	5	1	4	3	3	0
	55.5	4	1	3	8	6	2
	58.5	11	3	8	11	4	7
	61.5	7	4	3	8	3	5

## Sheet: H
Suppl Figure 3-1H		Number of cells, cell elongation plot in Figure 4H
		WT				hkb
		time	N			time	N
		-15.84	873			-18.3	40
		-12.4	1340			-14.9	98
		-8.96	1615			-11.5	211
		-5.52	1826			-8.1	169
		-2.08	1814			-4.7	288
		1.36	2122			-1.3	242
		4.8	1989			2.1	226
		8.24	1767			5.5	222
		11.68	1537			8.9	251
		15.12	1471			12.3	236
		18.56	1109			15.7	162
		22	1112			19.1	311
		25.44	1089			22.5	264
		28.88	1046			25.9	241
		32.32	900			29.3	260
		35.76	791			32.7	283
		39.2	660			36.1	231
		42.64	484			39.5	245
		46.08	442			42.9	270
		49.52	322			46.3	354
		52.96	292			49.7	319
		56.4	257			53.1	242
		59.84	223			56.5	263
		63.28	170			59.9	215
						63.3	192
