# Supplementary material for: Correct regionalization of a tissue primordium is essential for coordinated morphogenesis
Source: eLife journal article supplement (doi:10.7554/elife.72369), 2021-11-01
Supplement: supp [file elife_poa_e72369_Figure_3_source_data_1.xlsx]

## Sheet: J
Figure 3J	Cumulative area change (pp per min)
	Time	far from pit wt	near pit wt			Time	far from pit hkb	near pit hkb
	-18.3	-0.00295203	-0.0158973			-16.5	-0.00325861	0.00542958
	-14.9	-0.0119775	-0.0599911			-13.5	0.0128728	0.00281342
	-11.5	-0.024033	-0.0952453			-10.5	0.0260658	0.000776146
	-8.1	-0.0348668	-0.132995			-7.5	0.0340363	-0.0136031
	-4.7	-0.0397944	-0.15932			-4.5	0.0410665	-0.0281371
	-1.3	-0.0432088	-0.206959			-1.5	0.0290424	-0.0352029
	2.1	-0.0322673	-0.24919			1.5	0.0327875	-0.0491914
	5.5	-0.0150075	-0.289587			4.5	0.0399242	-0.0490397
	8.9	-0.0100898	-0.344227			7.5	0.046635	-0.0502383
	12.3	-0.0268468	-0.429814			10.5	0.0589016	-0.0623891
	15.7	-0.0386423	-0.456927			13.5	0.0612882	-0.070217
	19.1	-0.0605115	-0.506591			16.5	0.0508762	-0.0702318
	22.5	-0.0785707	-0.584679			19.5	0.0557815	-0.0864665
	25.9	-0.103082	-0.639829			22.5	0.0481366	-0.0997691
	29.3	-0.151768	-0.710822			25.5	0.0299759	-0.122578
	32.7	-0.203204				28.5	0.0148349	-0.140686
	36.1	-0.256955				31.5	0.00984166	-0.150071
	39.5	-0.326766				34.5	0.00381506	-0.17338
	42.9	-0.371484				37.5	-0.0155153	-0.206461
	46.3	-0.422208				40.5	-0.0235583	-0.245194
	49.7	-0.50387				43.5	-0.0275612	-0.270811
	53.1	-0.559853				46.5	-0.0362128	-0.291569
	56.5	-0.603192				49.5	-0.049403	-0.313946
	59.9	-0.698276				52.5	-0.0506027	-0.367821
	63.3	-0.777492				55.5	-0.0821383	-0.400145
						58.5	-0.102136	-0.421056
