# Supplementary material for: Correct regionalization of a tissue primordium is essential for coordinated morphogenesis
Source: eLife journal article supplement (doi:10.7554/elife.72369), 2021-11-01
Supplement: supp [file elife_poa_e72369_Figure_4_figure_supplement_1_source_data_1.xlsx]

## Sheet: A dash, tissueSRT
Figure 4- figure supplement 1, nearpit Tissue SRT v00
	WT						Statistics per time-interval
	Time	lower	mean	upper	N		Time	pvalues
	-16.5	-0.00810793	-0.00577303	-0.00343813	77		-16.5	0.233418
	-13.5	-0.00670991	-0.00486776	-0.00302561	432		-13.5	0.00569833
	-10.5	-0.00548345	-0.00357499	-0.00166654	611		-10.5	0.0453969
	-7.5	-0.00742322	-0.00515301	-0.0028828	678		-7.5	0.0179287
	-4.5	-0.00465136	-0.00255049	-0.000449615	781		-4.5	0.252675
	-1.5	-0.00603839	-0.00362172	-0.00120506	928		-1.5	0.0172307
	1.5	-0.00764548	-0.00539847	-0.00315146	753		1.5	0.00506922
	4.5	-0.0118338	-0.00925072	-0.00666764	637		4.5	0.0005502
	7.5	-0.00937915	-0.00616742	-0.00295569	543		7.5	0.29081
	10.5	-0.0108503	-0.00747605	-0.00410176	444		10.5	0.000699474
	13.5	-0.0108642	-0.008118	-0.00537182	272		13.5	0.0628099
	16.5	-0.0105682	-0.00692414	-0.00328005	135		16.5	0.00246479
	19.5	-0.00908662	-0.00568017	-0.00227372	102		19.5	0.281759
	22.5	-0.00137802	0.00212173	0.00562148	49		22.5	0.694627
	hkb
	Time	lower	mean	upper	N
	-16.5	0.00143588	0.0037686	0.00610132	87
	-13.5	0.000263275	0.0021692	0.00407513	176
	-10.5	-0.000732364	0.00175324	0.00423884	179
	-7.5	-0.00176963	0.000515266	0.00280016	227
	-4.5	-0.00245499	0.000123349	0.00270169	258
	-1.5	-0.00136584	0.00108469	0.00353523	169
	1.5	0.000138144	0.00254232	0.00494649	210
	4.5	-0.00209146	0.000339296	0.00277005	242
	7.5	-0.00357853	-0.000877146	0.00182424	234
	10.5	-0.00284208	-0.000435899	0.00197028	281
	13.5	-0.00329094	-0.00052908	0.00223278	261
	16.5	-0.000373411	0.00233059	0.00503458	242
	19.5	-0.00367203	-0.000584887	0.00250225	227
	22.5	-0.00701822	-0.002838	0.00134222	112

## Sheet: A dash, CellShape SRT
Figure 4- figure supplement 1, nearpit CellShape SRT v00
	WT						Statistics per time-interval
	Time	lower	mean	upper	N		Time	pvalues
	-16.5	-0.0106745	-0.00869987	-0.00672525	77		-16.5	0.0245168
	-13.5	-0.00684986	-0.00528096	-0.00371207	432		-13.5	5.99616e-05
	-10.5	-0.00559713	-0.00408094	-0.00256476	611		-10.5	0.0612703
	-7.5	-0.00804198	-0.00617962	-0.00431726	678		-7.5	0.0062206
	-4.5	-0.00669641	-0.00491844	-0.00314047	781		-4.5	0.0488902
	-1.5	-0.00755225	-0.00564763	-0.00374301	928		-1.5	0.0616769
	1.5	-0.00877316	-0.00676446	-0.00475576	753		1.5	0.246933
	4.5	-0.0120623	-0.0100081	-0.00795399	637		4.5	0.000508486
	7.5	-0.00985955	-0.007102	-0.00434445	543		7.5	0.0735419
	10.5	-0.0109708	-0.0085488	-0.00612684	444		10.5	0.00194305
	13.5	-0.00841662	-0.00645558	-0.00449455	272		13.5	0.0906504
	16.5	-0.0121331	-0.00934511	-0.00655707	135		16.5	0.0513067
	19.5	-0.0119808	-0.00991649	-0.00785221	102		19.5	0.186482
	22.5	-0.00678851	-0.00376718	-0.000745853	49		22.5	0.661602
	hkb
	Time	lower	mean	upper	N
	-16.5	0.000616173	0.00278224	0.00494831	87
	-13.5	0.00180844	0.00340908	0.00500972	176
	-10.5	-0.00259145	-0.000491356	0.00160873	179
	-7.5	-0.00122263	0.000552493	0.00232762	227
	-4.5	-0.00243648	-0.000220135	0.00199621	258
	-1.5	-0.00263274	-0.000335076	0.00196258	169
	1.5	-0.00431889	-0.00230056	-0.000282223	210
	4.5	-0.00357158	-0.00178011	1.13718e-05	242
	7.5	-0.00327106	-0.00117354	0.000923977	234
	10.5	-0.00256142	-0.000498182	0.00156506	281
	13.5	-0.00446126	-0.00242236	-0.000383462	261
	16.5	-0.00533111	-0.0031002	-0.000869297	242
	19.5	-0.00492411	-0.00259239	-0.000260684	227
	22.5	-0.00372603	-0.00133538	0.00105526	112

## Sheet: A dash, Intercalation SRT
Figure 4- figure supplement 1, nearpit Intercalation SRT v00
	WT						Statistics per time-interval
	Time	lower	mean	upper	N		Time	pvalues
	-16.5	0.00113864	0.00268356	0.00422848	77		-16.5	0.296091
	-13.5	-0.00112362	0.000299719	0.00172306	432		-13.5	0.226322
	-10.5	-0.00116541	0.000175915	0.00151724	611		-10.5	0.602071
	-7.5	-0.000762509	0.00077604	0.00231459	678		-7.5	0.0853837
	-4.5	0.000852672	0.00230679	0.00376091	781		-4.5	0.0458944
	-1.5	0.0003335	0.0018675	0.0034015	928		-1.5	0.347867
	1.5	-0.000282279	0.00126607	0.00281441	753		1.5	0.32136
	4.5	-1.72781e-05	0.00174156	0.00350039	637		4.5	0.261832
	7.5	-0.00116523	0.00125048	0.0036662	543		7.5	0.546311
	10.5	-0.000589252	0.00181177	0.00421279	444		10.5	0.919951
	13.5	-0.00235986	-0.000431452	0.00149695	272		13.5	0.657851
	16.5	-0.00181113	0.00116553	0.00414219	135		16.5	0.338495
	19.5	0.000274243	0.00238365	0.00449305	102		19.5	0.272916
	22.5	0.00155268	0.00438275	0.00721282	49		22.5	0.752427
	hkb
	Time	lower	mean	upper	N
	-16.5	-0.000919918	0.000756521	0.00243296	87
	-13.5	-0.00339621	-0.00171804	-3.98717e-05	176
	-10.5	-0.000396872	0.00104359	0.00248406	179
	-7.5	-0.00209963	-0.000465004	0.00116962	227
	-4.5	-0.00174441	-9.03322e-05	0.00156375	258
	-1.5	-0.000997101	0.000471767	0.00194063	169
	1.5	0.00154475	0.00336681	0.00518887	210
	4.5	-0.000531104	0.00121371	0.00295853	242
	7.5	-0.000980724	0.000729322	0.00243937	234
	10.5	-0.001598	0.000288803	0.00217561	281
	13.5	2.34883e-05	0.00168875	0.00335401	261
	16.5	0.00126578	0.0032341	0.00520242	242
	19.5	-0.00275386	-0.000512117	0.00172963	227
	22.5	-0.00512412	-0.00230028	0.000523567	112

## Sheet: A dash dash, Tissue SRT
Figure 4- figure supplement 1, nearpit Tissue SRT v01
	WT						Statistics per time-interval
	Time	lower	mean	upper	N		Time	pvalues
	-16.5	-0.0139198	-0.0116905	-0.0094612	77		-16.5	1.54854e-06
	-13.5	-0.00687477	-0.00477982	-0.00268486	432		-13.5	0.201121
	-10.5	-0.00852644	-0.00657001	-0.00461359	611		-10.5	0.240388
	-7.5	-0.00736991	-0.00504393	-0.00271796	678		-7.5	0.960257
	-4.5	-0.00966958	-0.00745979	-0.00524999	781		-4.5	0.136955
	-1.5	-0.00996716	-0.0078098	-0.00565243	928		-1.5	0.201716
	1.5	-0.0114253	-0.00921513	-0.00700492	753		1.5	0.44826
	4.5	-0.0130739	-0.0107542	-0.00843453	637		4.5	1.46594e-05
	7.5	-0.013829	-0.0106978	-0.00756663	543		7.5	1.11698e-07
	10.5	-0.0156211	-0.0126807	-0.00974031	444		10.5	0.00182023
	13.5	-0.015472	-0.0131416	-0.0108112	272		13.5	0.00943851
	16.5	-0.0138207	-0.00899437	-0.00416804	135		16.5	0.165638
	19.5	-0.0119821	-0.0079359	-0.00388973	102		19.5	0.611111
	22.5	-0.0204257	-0.0153946	-0.0103635	49		22.5	0.0110926
	hkb
	Time	lower	mean	upper	N
	-16.5	-0.00126813	0.000782303	0.00283274	87
	-13.5	-0.00205574	-0.000174444	0.00170686	176
	-10.5	-0.00435272	-0.00219184	-3.09643e-05	179
	-7.5	-0.00657546	-0.00434679	-0.00211813	227
	-4.5	-0.0054457	-0.00291873	-0.000391749	258
	-1.5	-0.00589721	-0.00320151	-0.000505806	169
	1.5	-0.00775934	-0.00468457	-0.0016098	210
	4.5	-0.00292631	-0.000533128	0.00186005	242
	7.5	-0.00329233	-0.000885368	0.00152159	234
	10.5	-0.00385151	-0.00145864	0.00093423	281
	13.5	-0.00456647	-0.00205378	0.000458901	261
	16.5	-0.00567633	-0.00344908	-0.00122184	242
	19.5	-0.00742664	-0.00458129	-0.00173594	227
	22.5	-0.00508042	-0.00202429	0.00103184	112

## Sheet: A dash dash, CellShape SRT
Figure 4- figure supplement 1, nearpit CellShape SRT v01
	WT						Statistics per time-interval
	Time	lower	mean	upper	N		Time	pvalues
	-16.5	-0.00988478	-0.00789926	-0.00591374	77		-16.5	9.68393e-05
	-13.5	-0.00629003	-0.00461169	-0.00293336	432		-13.5	0.608171
	-10.5	-0.00796191	-0.00635015	-0.0047384	611		-10.5	0.0749935
	-7.5	-0.00677259	-0.00457463	-0.00237667	678		-7.5	0.905647
	-4.5	-0.00667795	-0.00486556	-0.00305317	781		-4.5	0.531208
	-1.5	-0.00775358	-0.00584622	-0.00393886	928		-1.5	0.31097
	1.5	-0.0095319	-0.00771666	-0.00590141	753		1.5	0.217212
	4.5	-0.00973111	-0.00771202	-0.00569293	637		4.5	0.00489595
	7.5	-0.0112835	-0.00871464	-0.00614575	543		7.5	0.000243849
	10.5	-0.011885	-0.00951838	-0.00715175	444		10.5	0.00671531
	13.5	-0.0135065	-0.0114992	-0.00949193	272		13.5	0.0200942
	16.5	-0.0124318	-0.00928978	-0.00614781	135		16.5	0.0252918
	19.5	-0.008937	-0.00597609	-0.00301518	102		19.5	0.615559
	22.5	-0.0134057	-0.0103948	-0.00738393	49		22.5	0.0124397
	hkb
	Time	lower	mean	upper	N
	-16.5	-0.000419855	0.00165458	0.00372901	87
	-13.5	-0.00388374	-0.00191342	5.68969e-05	176
	-10.5	-0.00412753	-0.00253619	-0.000944854	179
	-7.5	-0.00599632	-0.00436342	-0.00273052	227
	-4.5	-0.00532542	-0.00322132	-0.00111721	258
	-1.5	-0.00494124	-0.00276657	-0.000591906	169
	1.5	-0.00469974	-0.00226688	0.000165975	210
	4.5	-0.00266562	-0.000648793	0.00136803	242
	7.5	-0.00165839	0.000394387	0.00244717	234
	10.5	-0.00267529	-0.000592448	0.00149039	281
	13.5	-0.00321499	-0.000905779	0.00140343	261
	16.5	-0.00341384	-0.00126947	0.000874897	242
	19.5	-0.00875773	-0.00664163	-0.00452552	227
	22.5	-0.00707768	-0.00472796	-0.00237824	112

## Sheet: A dash dash, Intercalation SRT
Figure 4- figure supplement 1, nearpit Intercalation SRT v01
	WT						Statistics per time-interval
	Time	lower	mean	upper	N		Time	pvalues
	-16.5	-0.00422848	-0.00268356	-0.00113864	77		-16.5	0.296091
	-13.5	-0.00172306	-0.000299719	0.00112362	432		-13.5	0.226322
	-10.5	-0.00151724	-0.00017592	0.0011654	611		-10.5	0.602071
	-7.5	-0.00231459	-0.00077604	0.000762509	678		-7.5	0.0853837
	-4.5	-0.00376091	-0.00230679	-0.000852673	781		-4.5	0.0458939
	-1.5	-0.0034015	-0.0018675	-0.0003335	928		-1.5	0.347867
	1.5	-0.00281442	-0.00126607	0.000282277	753		1.5	0.32136
	4.5	-0.00350039	-0.00174155	1.72792e-05	637		4.5	0.261833
	7.5	-0.00366619	-0.00125048	0.00116523	543		7.5	0.546313
	10.5	-0.00421279	-0.00181177	0.000589252	444		10.5	0.919951
	13.5	-0.00149694	0.000431459	0.00235986	272		13.5	0.657849
	16.5	-0.0041422	-0.00116553	0.00181113	135		16.5	0.338497
	19.5	-0.00449305	-0.00238365	-0.000274243	102		19.5	0.272915
	22.5	-0.00721282	-0.00438275	-0.00155268	49		22.5	0.752427
	hkb
	Time	lower	mean	upper	N
	-16.5	-0.00243296	-0.000756521	0.000919918	87
	-13.5	3.98685e-05	0.00171804	0.00339621	176
	-10.5	-0.00248406	-0.00104359	0.000396872	179
	-7.5	-0.00116962	0.000465004	0.00209963	227
	-4.5	-0.00156375	9.03378e-05	0.00174442	258
	-1.5	-0.00194063	-0.000471767	0.000997101	169
	1.5	-0.00518887	-0.00336681	-0.00154475	210
	4.5	-0.00295853	-0.00121371	0.000531104	242
	7.5	-0.00243937	-0.000729326	0.00098072	234
	10.5	-0.00217561	-0.000288803	0.001598	281
	13.5	-0.00335401	-0.00168875	-2.34905e-05	261
	16.5	-0.00520242	-0.0032341	-0.00126578	242
	19.5	-0.00172963	0.00051212	0.00275387	227
	22.5	-0.000523567	0.00230028	0.00512412	112

## Sheet: B dash, Tissue SRT
Figure 4- figure supplement 1, farpit Tissue SRT v00
	WT						Statistics per time-interval
	Time	lower	mean	upper	N		Time	pvalues
	-16.5	0.0018253	0.00310661	0.00438791	143		-16.5	0.685637
	-13.5	0.00102418	0.00253651	0.00404884	706		-13.5	0.714332
	-10.5	-0.00206117	-0.000575751	0.00090967	1082		-10.5	0.396155
	-7.5	-0.00128848	0.000306949	0.00190238	1210		-7.5	0.00905234
	-4.5	0.00203255	0.00351115	0.00498975	1416		-4.5	0.434679
	-1.5	0.00349988	0.00488085	0.00626182	1728		-1.5	0.000276048
	1.5	0.000319734	0.00171015	0.00310057	1536		1.5	0.47415
	4.5	0.00251136	0.00403982	0.00556828	1428		4.5	0.736704
	7.5	0.00338868	0.00498653	0.00658438	1409		7.5	0.411391
	10.5	0.00341441	0.00503709	0.00665976	1328		10.5	0.332719
	13.5	-0.000559324	0.000845782	0.00225089	1089		13.5	0.886529
	16.5	0.00233329	0.00383799	0.00534269	938		16.5	0.0777295
	19.5	0.00117087	0.00277697	0.00438307	866		19.5	0.572585
	22.5	0.00408134	0.00556729	0.00705325	784		22.5	0.0847336
	25.5	0.00158025	0.00310334	0.00462642	543		25.5	0.278781
	28.5	-0.00188982	-0.000355107	0.00117961	746		28.5	0.480201
	31.5	-0.00316947	-0.00123642	0.000696624	477		31.5	0.995496
	34.5	-0.00226067	-0.00015214	0.00195639	462		34.5	0.574092
	37.5	-0.00231115	-0.000233218	0.00184472	396		37.5	0.592358
	40.5	-0.0113694	-0.00900952	-0.00664965	274		40.5	0.00142345
	43.5	-0.00448315	-0.00208504	0.00031308	278		43.5	0.561283
	46.5	-0.00450439	-0.0021361	0.000232186	227		46.5	0.439739
	49.5	-0.0070237	-0.00367587	-0.000328043	161		49.5	0.630227
	52.5	-0.0111653	-0.00839961	-0.00563389	168		52.5	0.602546
	55.5	-0.004173	-0.000374449	0.0034241	98		55.5	0.391715
	58.5	-0.0179744	-0.0118976	-0.00582073	19		58.5	0.42417
	hkb
	Time	lower	mean	upper	N
	-16.5	-0.00389926	-0.00178818	0.000322907	91
	-13.5	0.00190879	0.00401958	0.00613037	178
	-10.5	-0.000544269	0.00171257	0.0039694	190
	-7.5	0.00260991	0.00446747	0.00632503	261
	-4.5	0.00227854	0.00453267	0.00678681	286
	-1.5	-0.00660554	-0.00417383	-0.00174211	179
	1.5	-0.00227196	4.15854e-05	0.00235513	242
	4.5	0.00116101	0.00357101	0.005981	282
	7.5	0.00133604	0.00346514	0.00559424	290
	10.5	-0.000235291	0.00219576	0.00462682	323
	13.5	-0.00202736	0.00046333	0.00295402	308
	16.5	-0.0036769	-0.0010813	0.00151431	285
	19.5	0.00198565	0.00492516	0.00786466	267
	22.5	-0.00700317	-0.0042691	-0.00153503	198
	25.5	-0.00409691	-0.00159598	0.000904949	265
	28.5	-0.00411512	-0.00183742	0.000440281	282
	31.5	-0.00326192	-0.000915727	0.00143046	289
	34.5	-0.000950712	0.00123983	0.00343036	242
	37.5	-0.0052562	-0.00264657	-3.6943e-05	240
	40.5	-0.00171179	0.0012599	0.0042316	247
	43.5	0.000379057	0.00271202	0.00504499	135
	46.5	-0.00110742	0.00113743	0.00338229	139
	49.5	-0.00318783	-0.000951808	0.00128421	179
	52.5	-0.00440697	-0.0017811	0.000844763	98
	55.5	-0.00878639	-0.00604077	-0.00329516	156
	58.5	-0.00575777	-0.00281707	0.000123631	116

## Sheet: B dash, CellShape SRT
Figure 4- figure supplement 1, farpit CellShape SRT v00
	WT						Statistics per time-interval
	Time	lower	mean	upper	N		Time	pvalues
	-16.5	0.0031341	0.00418715	0.00524021	143		-16.5	0.00509969
	-13.5	-0.000160885	0.00121974	0.00260037	706		-13.5	0.884842
	-10.5	-0.0035415	-0.0023525	-0.0011635	1082		-10.5	0.0279462
	-7.5	-0.00192033	-0.000551043	0.000818243	1210		-7.5	0.335066
	-4.5	-0.000640574	0.000618605	0.00187778	1416		-4.5	0.169842
	-1.5	0.000410912	0.00159582	0.00278072	1728		-1.5	0.00308477
	1.5	-0.00197896	-0.000817795	0.000343374	1536		1.5	0.72498
	4.5	6.84369e-05	0.00131771	0.00256698	1428		4.5	0.910139
	7.5	-0.000501392	0.000771828	0.00204505	1409		7.5	0.543697
	10.5	0.000621125	0.00191252	0.00320392	1328		10.5	0.00501449
	13.5	-0.00264748	-0.00154167	-0.000435854	1089		13.5	0.690956
	16.5	-0.000909422	0.000425009	0.00175944	938		16.5	0.532806
	19.5	-0.00260837	-0.00130356	1.24826e-06	866		19.5	0.614571
	22.5	0.000561053	0.00188623	0.00321141	784		22.5	0.455856
	25.5	-0.00239359	-0.00102835	0.000336895	543		25.5	0.690619
	28.5	-0.00545784	-0.00417776	-0.00289769	746		28.5	0.424088
	31.5	-0.00565843	-0.00407764	-0.00249686	477		31.5	0.719006
	34.5	-0.00691431	-0.00517119	-0.00342808	462		34.5	0.265623
	37.5	-0.00506787	-0.00347895	-0.00189004	396		37.5	0.723295
	40.5	-0.0111866	-0.00927495	-0.00736333	274		40.5	0.00699324
	43.5	-0.00674249	-0.00477063	-0.00279876	278		43.5	0.524613
	46.5	-0.00749653	-0.00541583	-0.00333514	227		46.5	0.0523833
	49.5	-0.0105925	-0.00793639	-0.00528023	161		49.5	0.691644
	52.5	-0.0113931	-0.00956314	-0.0077332	168		52.5	0.385858
	55.5	-0.0062625	-0.00349861	-0.000734726	98		55.5	0.291018
	58.5	-0.0155996	-0.010818	-0.00603645	19		58.5	0.382439
	hkb
	Time	lower	mean	upper	N
	-16.5	-0.00234797	-0.000485045	0.00137788	91
	-13.5	0.000187151	0.001669	0.00315084	178
	-10.5	-0.00041438	0.00177697	0.00396832	190
	-7.5	-0.00068548	0.00116665	0.00301879	261
	-4.5	0.000521814	0.00238927	0.00425673	286
	-1.5	-0.00860843	-0.0065363	-0.00446416	179
	1.5	-0.0022574	-0.00034019	0.00157702	242
	4.5	-0.000523296	0.00103851	0.00260032	282
	7.5	-0.00212327	-0.000328163	0.00146694	290
	10.5	-0.00461851	-0.00279695	-0.000975387	323
	13.5	-0.0046233	-0.00267421	-0.000725111	308
	16.5	-0.00329292	-0.00109386	0.0011052	285
	19.5	-0.00154267	0.000374412	0.0022915	267
	22.5	-0.00459147	-0.00231848	-4.5486e-05	198
	25.5	-0.00423412	-0.00207116	9.17944e-05	265
	28.5	-0.00452088	-0.0024244	-0.000327922	282
	31.5	-0.00443206	-0.00272396	-0.00101586	289
	34.5	-0.00257685	-0.000454471	0.0016679	242
	37.5	-0.00750165	-0.00542478	-0.00334792	240
	40.5	-0.00411183	-0.00192483	0.00026218	247
	43.5	-0.00248042	-0.000561649	0.00135713	135
	46.5	-0.00240207	-0.000554532	0.00129301	139
	49.5	-0.00791843	-0.00602197	-0.00412551	179
	52.5	-0.00428006	-0.00267985	-0.00107965	98
	55.5	-0.00987295	-0.00782674	-0.00578053	156
	58.5	-0.00528386	-0.0033201	-0.00135633	116

## Sheet: B dash, Intercalation SRT
Figure 4- figure supplement 1, farpit Intercalation SRT v00
	WT						Statistics per time-interval
	Time	lower	mean	upper	N		Time	pvalues
	-16.5	-0.00153702	-0.000570105	0.000396808	143		-16.5	0.930303
	-13.5	-0.0004917	0.000575635	0.00164297	706		-13.5	0.243507
	-10.5	-0.000476424	0.000541029	0.00155848	1082		-10.5	0.598994
	-7.5	-0.00089278	0.000208965	0.00131071	1210		-7.5	0.381096
	-4.5	0.000451955	0.00148635	0.00252075	1416		-4.5	0.981872
	-1.5	0.00166072	0.00256614	0.00347156	1728		-1.5	0.942377
	1.5	0.00119501	0.00221646	0.00323792	1536		1.5	0.0210573
	4.5	0.000778845	0.00177543	0.00277201	1428		4.5	0.695173
	7.5	0.00212746	0.00325825	0.00438905	1409		7.5	0.735954
	10.5	0.00126885	0.00229241	0.00331598	1328		10.5	0.044669
	13.5	0.00127617	0.00222115	0.00316612	1089		13.5	0.844538
	16.5	0.00124602	0.0023425	0.00343898	938		16.5	0.309114
	19.5	0.00190547	0.00292536	0.00394525	866		19.5	0.970829
	22.5	0.000690259	0.00174618	0.00280211	784		22.5	0.364988
	25.5	0.00196606	0.00302261	0.00407915	543		25.5	0.142026
	28.5	0.00211888	0.00302888	0.00393888	746		28.5	0.395769
	31.5	0.000849157	0.00210114	0.00335311	477		31.5	0.131593
	34.5	0.00224575	0.0034146	0.00458346	462		34.5	0.773616
	37.5	0.00159074	0.00300238	0.00441402	396		37.5	0.916294
	40.5	-2.32149e-06	0.0015729	0.00314812	274		40.5	0.695413
	43.5	-0.000713686	0.00069616	0.00210601	278		43.5	0.582359
	46.5	0.00228539	0.00398422	0.00568305	227		46.5	0.70406
	49.5	0.00153272	0.00371071	0.00588869	161		49.5	0.379729
	52.5	-0.0019638	3.31629e-05	0.00203012	168		52.5	0.812544
	55.5	-0.000754114	0.00164794	0.00404999	98		55.5	0.659085
	58.5	-0.00498892	-0.000857053	0.00327481	19		58.5	0.938237
	hkb
	Time	lower	mean	upper	N
	-16.5	-0.00126924	0.000200965	0.00167117	91
	-13.5	0.00010946	0.00174981	0.00339016	178
	-10.5	-0.00211058	-0.000300327	0.00150993	190
	-7.5	-0.000330826	0.00106244	0.00245571	261
	-4.5	-0.000469436	0.00122429	0.00291802	286
	-1.5	0.000840732	0.00236731	0.00389389	179
	1.5	-0.0022386	-0.000797099	0.000644407	242
	4.5	0.000863335	0.002299	0.00373466	282
	7.5	0.00149506	0.0030936	0.00469214	290
	10.5	0.0031162	0.00500153	0.00688685	323
	13.5	0.00011493	0.00179664	0.00347836	308
	16.5	-0.00139199	0.000157925	0.00170784	285
	19.5	0.000680381	0.00270959	0.0047388	267
	22.5	-0.00321648	-0.000815572	0.00158534	198
	25.5	-0.0010823	0.00064217	0.00236664	265
	28.5	-0.00118298	0.000639348	0.00246168	282
	31.5	-0.00152202	0.000455129	0.00243227	289
	34.5	-4.49256e-05	0.00216597	0.00437686	242
	37.5	0.00114004	0.00324503	0.00535001	240
	40.5	6.8233e-05	0.00219762	0.00432701	247
	43.5	0.000330766	0.002326	0.00432123	135
	46.5	0.000327048	0.0021469	0.00396675	139
	49.5	0.00245144	0.00426945	0.00608746	179
	52.5	-0.00235066	-0.000301271	0.00174811	98
	55.5	8.56819e-05	0.00213512	0.00418456	156
	58.5	-0.00246852	-0.000783724	0.000901072	116

## Sheet: B dash dash, Tissue SRT
Figure 4- figure supplement 1, farpit Tissue SRT v01
	WT						Statistics per time-interval
	Time	lower	mean	upper	N		Time	pvalues
	-16.5	-0.00158764	-0.00031458	0.000958474	143		-16.5	0.498434
	-13.5	-0.00540368	-0.00390062	-0.00239755	706		-13.5	0.0328171
	-10.5	-0.00279389	-0.00148462	-0.000175356	1082		-10.5	0.0142346
	-7.5	-0.00337991	-0.00196046	-0.000541007	1210		-7.5	0.926639
	-4.5	-0.00436956	-0.00289779	-0.00142602	1416		-4.5	0.679852
	-1.5	-0.0039156	-0.00259081	-0.00126603	1728		-1.5	0.0675769
	1.5	-0.00356139	-0.00219171	-0.00082202	1536		1.5	0.0730225
	4.5	-0.00471589	-0.00330798	-0.00190006	1428		4.5	0.494036
	7.5	-0.00449457	-0.00305708	-0.00161959	1409		7.5	0.143461
	10.5	-0.00586583	-0.00447224	-0.00307865	1328		10.5	0.0485974
	13.5	-0.00659802	-0.0053618	-0.00412558	1089		13.5	0.0115135
	16.5	-0.00878539	-0.00720761	-0.00562983	938		16.5	0.0826336
	19.5	-0.00947822	-0.00785807	-0.00623792	866		19.5	0.0858559
	22.5	-0.00798913	-0.00649468	-0.00500024	784		22.5	0.00830765
	25.5	-0.0131035	-0.0115086	-0.00991359	543		25.5	0.0016969
	28.5	-0.0127254	-0.0113485	-0.00997156	746		28.5	0.000517991
	31.5	-0.0145105	-0.0127126	-0.0109148	477		31.5	1.27324e-06
	34.5	-0.0149877	-0.0130157	-0.0110437	462		34.5	2.65542e-05
	37.5	-0.0147388	-0.0125614	-0.010384	396		37.5	0.0384874
	40.5	-0.0144087	-0.0119932	-0.00957774	274		40.5	0.0477034
	43.5	-0.0117607	-0.00942638	-0.00709205	278		43.5	0.0314082
	46.5	-0.0112676	-0.00943874	-0.00760991	227		46.5	0.598547
	49.5	-0.0208625	-0.0184721	-0.0160817	161		49.5	1.3324e-06
	52.5	-0.0123489	-0.0100345	-0.00772001	168		52.5	0.0326784
	55.5	-0.0064726	-0.0034998	-0.000526991	98		55.5	0.590809
	58.5	-0.0143311	-0.0110242	-0.00771718	19		58.5	0.112374
	hkb
	Time	lower	mean	upper	N
	-16.5	-0.00122414	0.00116964	0.00356341	91
	-13.5	-0.00104062	0.00112481	0.00329024	178
	-10.5	0.000262921	0.00243127	0.00459962	190
	-7.5	-0.00332516	-0.00134722	0.000630713	261
	-4.5	-0.00495283	-0.0017171	0.00151863	286
	-1.5	-0.000729762	0.00171341	0.00415658	179
	1.5	-0.000570048	0.00178609	0.00414223	242
	4.5	-0.00372157	-0.00159324	0.000535085	282
	7.5	-0.00241406	-0.000250802	0.00191245	290
	10.5	-0.00148145	0.000896829	0.00327511	323
	13.5	-0.0018368	0.000509953	0.0028567	308
	16.5	-0.0034036	-0.00097774	0.00144812	285
	19.5	-0.00477332	-0.00185	0.00107333	267
	22.5	-0.0010431	0.00212106	0.00528521	198
	25.5	-0.0070343	-0.00446323	-0.00189215	265
	28.5	-0.00564136	-0.00299813	-0.000354898	282
	31.5	-0.0025361	8.92462e-05	0.00271459	289
	34.5	-0.00613393	-0.00317426	-0.0002146	242
	37.5	-0.00756452	-0.00474807	-0.00193162	240
	40.5	-0.00822093	-0.00589352	-0.00356611	202
	43.5	-0.00743685	-0.00485729	-0.00227773	135
	46.5	-0.00795546	-0.00536112	-0.00276678	139
	49.5	-0.00746275	-0.00509294	-0.00272313	179
	52.5	-0.00214971	0.000437464	0.00302464	98
	55.5	-0.00912539	-0.00648629	-0.00384718	156
	58.5	-0.00411664	-0.00168018	0.000756279	116

[truncated: 2 more sheets: B dash dash, CellShape SRT, B dash dash, Intercalation SRT]
