# Supplementary material for: Correct regionalization of a tissue primordium is essential for coordinated morphogenesis
Source: eLife journal article supplement (doi:10.7554/elife.72369), 2021-11-01
Supplement: supp [file elife_poa_e72369_Figure_4_source_data_1.xlsx]

## Sheet: A
Figure 4A	Cummulative strain rate (pp per min) vector 00 nearpit
	WT					hkb
	Time	tissue SRT wt	cellshape SRT wt	intercalation SRT wt		Time	tissue SRT wt	cellshape SRT wt	intercalation SRT wt
	-16.5	-0.0173	-0.0261	0.0081		-13.5	0.0065	0.0102	-0.0052
	-13.5	-0.0319	-0.0419	0.0089		-10.5	0.0118	0.0088	-0.002
	-10.5	-0.0426	-0.0542	0.0095		-7.5	0.0133	0.0104	-0.0034
	-7.5	-0.0581	-0.0727	0.0118		-4.5	0.0137	0.0098	-0.0037
	-4.5	-0.0658	-0.0875	0.0187		-1.5	0.0169	0.0087	-0.0023
	-1.5	-0.0766	-0.1044	0.0243		1.5	0.0246	0.0018	0.0078
	1.5	-0.0928	-0.1247	0.0281		4.5	0.0256	-0.0035	0.0115
	4.5	-0.1206	-0.1547	0.0334		7.5	0.023	-0.007	0.0137
	7.5	-0.1391	-0.176	0.0371		10.5	0.0216	-0.0085	0.0145
	10.5	-0.1615	-0.2017	0.0425		13.5	0.0201	-0.0158	0.0196
	13.5	-0.1859	-0.2211	0.0412		16.5	0.027	-0.0251	0.0293
	16.5	-0.2066	-0.2491	0.0447		19.5	0.0253	-0.0329	0.0278
	19.5	-0.2237	-0.2788	0.0519		22.5	0.022	-0.0363	0.0252
	22.5	-0.2173	-0.2901	0.065		25.5	0.0132	-0.0484	0.0257
						28.5	0.0065	-0.0641	0.031
						31.5	0.0062	-0.0737	0.0351
						34.5	-0.0021	-0.0843	0.0363
						37.5	-0.014	-0.1015	0.0391
						40.5	-0.0272	-0.1193	0.0453
						43.5	-0.0348	-0.1424	0.0619
						46.5	-0.0541	-0.1533	0.0536
						49.5	-0.07	-0.1759	0.0615
						52.5	-0.0939	-0.1929	0.0575
						55.5	-0.1153	-0.2134	0.0563
						58.5	-0.1239	-0.226	0.0605

## Sheet: A dash
Figure 4A'	Cummulative strain rate (pp per min) vector 01 nearpit
	WT					hkb
	Time	tissue SRT wt	cellshape SRT wt	intercalation SRT wt		Time	tissue SRT wt	cellshape SRT wt	intercalation SRT wt
	-16.5	-0.0351	-0.0237	-0.0081		-13.5	0.0065	-0.0057	0.0052
	-13.5	-0.0494	-0.0375	-0.0089		-10.5	0.0118	-0.0133	0.002
	-10.5	-0.0691	-0.0566	-0.0095		-7.5	0.0133	-0.0264	0.0034
	-7.5	-0.0843	-0.0703	-0.0118		-4.5	0.0137	-0.0361	0.0037
	-4.5	-0.1066	-0.0849	-0.0187		-1.5	0.0169	-0.0444	0.0023
	-1.5	-0.1301	-0.1024	-0.0243		1.5	0.0246	-0.0512	-0.0078
	1.5	-0.1577	-0.1256	-0.0281		4.5	0.0256	-0.0531	-0.0115
	4.5	-0.19	-0.1487	-0.0334		7.5	0.023	-0.052	-0.0137
	7.5	-0.2221	-0.1749	-0.0371		10.5	0.0216	-0.0537	-0.0145
	10.5	-0.2601	-0.2034	-0.0425		13.5	0.0201	-0.0565	-0.0196
	13.5	-0.2995	-0.2379	-0.0412		16.5	0.027	-0.0603	-0.0293
	16.5	-0.3265	-0.2658	-0.0447		19.5	0.0253	-0.0802	-0.0278
	19.5	-0.3503	-0.2837	-0.0519		22.5	0.022	-0.0907	-0.0252
	22.5	-0.3965	-0.3149	-0.065		25.5	0.0132	-0.1043	-0.0257
						28.5	0.0065	-0.1129	-0.031
						31.5	0.0062	-0.122	-0.0351
						34.5	-0.0021	-0.1373	-0.0363
						37.5	-0.014	-0.158	-0.0391
						40.5	-0.0272	-0.1647	-0.0453
						43.5	-0.0348	-0.1647	-0.0619
						46.5	-0.0541	-0.1855	-0.0536
						49.5	-0.07	-0.1958	-0.0615
						52.5	-0.0939	-0.2273	-0.0575
						55.5	-0.1153	-0.2364	-0.0563
						58.5	-0.1239	-0.2397	-0.0605

## Sheet: B
Figure 4B	Cummulative strain rate (pp per min) vector 00 farpit
	WT					hkb
	Time	tissue SRT wt	cellshape SRT wt	intercalation SRT wt		Time	tissue SRT hkb	cellshape SRT hkb	intercalation SRT hkb
	-16.5	0.0093	0.0126	-0.0017		-13.5	0.0121	0.005	0.0052
	-13.5	0.0169	0.0162	0		-10.5	0.0172	0.0103	0.0043
	-10.5	0.0152	0.0092	0.0016		-7.5	0.0306	0.0138	0.0075
	-7.5	0.0161	0.0075	0.0023		-4.5	0.0442	0.021	0.0112
	-4.5	0.0267	0.0094	0.0067		-1.5	0.0317	0.0014	0.0183
	-1.5	0.0413	0.0142	0.0144		1.5	0.0318	0.0004	0.0159
	1.5	0.0464	0.0117	0.0211		4.5	0.0425	0.0035	0.0228
	4.5	0.0585	0.0157	0.0264		7.5	0.0529	0.0025	0.0321
	7.5	0.0735	0.018	0.0362		10.5	0.0595	-0.0059	0.0471
	10.5	0.0886	0.0237	0.0431		13.5	0.0609	-0.0139	0.0525
	13.5	0.0912	0.0191	0.0497		16.5	0.0576	-0.0172	0.053
	16.5	0.1027	0.0204	0.0567		19.5	0.0724	-0.0161	0.0611
	19.5	0.111	0.0164	0.0655		22.5	0.0596	-0.023	0.0586
	22.5	0.1277	0.0221	0.0708		25.5	0.0548	-0.0292	0.0606
	25.5	0.137	0.019	0.0798		28.5	0.0493	-0.0365	0.0625
	28.5	0.1359	0.0065	0.0889		31.5	0.0466	-0.0447	0.0639
	31.5	0.1322	-0.0057	0.0952		34.5	0.0503	-0.046	0.0704
	34.5	0.1318	-0.0213	0.1055		37.5	0.0423	-0.0623	0.0801
	37.5	0.1311	-0.0317	0.1145		40.5	0.0506	-0.0681	0.0867
	40.5	0.1041	-0.0595	0.1192		43.5	0.0587	-0.0698	0.0937
	43.5	0.0978	-0.0738	0.1213		46.5	0.0621	-0.0714	0.1001
	46.5	0.0914	-0.0901	0.1332		49.5	0.0593	-0.0895	0.1129
	49.5	0.0804	-0.1139	0.1444		52.5	0.0539	-0.0975	0.112
	52.5	0.0552	-0.1426	0.1445		55.5	0.0358	-0.121	0.1184
	55.5	0.054	-0.1531	0.1494
	58.5	0.0183	-0.1855	0.1468

## Sheet: B dash
Figure 4B'	Cummulative strain rate (pp per min) vector 01 farpit
	WT					hkb
	Time	tissue SRT wt	cellshape SRT wt	intercalation SRT wt		Time	tissue SRT hkb	cellshape SRT hkb	intercalation SRT hkb
	-16.5	-0.0009	-0.0006	0.0017		-13.5	0.0034	0.0091	-0.0052
	-13.5	-0.0126	-0.0105	0		-10.5	0.0107	0.0157	-0.0043
	-10.5	-0.0171	-0.0163	-0.0016		-7.5	0.0066	0.0123	-0.0075
	-7.5	-0.023	-0.023	-0.0023		-4.5	0.0015	0.0109	-0.0112
	-4.5	-0.0317	-0.0288	-0.0067		-1.5	0.0066	0.0227	-0.0183
	-1.5	-0.0394	-0.0291	-0.0144		1.5	0.012	0.022	-0.0159
	1.5	-0.046	-0.029	-0.0211		4.5	0.0072	0.0233	-0.0228
	4.5	-0.0559	-0.0336	-0.0264		7.5	0.0064	0.0296	-0.0321
	7.5	-0.0651	-0.0331	-0.0362		10.5	0.0091	0.0446	-0.0471
	10.5	-0.0785	-0.0382	-0.0431		13.5	0.0107	0.0483	-0.0525
	13.5	-0.0946	-0.0455	-0.0497		16.5	0.0077	0.047	-0.053
	16.5	-0.1162	-0.0609	-0.0567		19.5	0.0022	0.0469	-0.0611
	19.5	-0.1398	-0.0756	-0.0655		22.5	0.0085	0.0496	-0.0586
	22.5	-0.1593	-0.0904	-0.0708		25.5	-0.0048	0.0405	-0.0606
	25.5	-0.1938	-0.1145	-0.0798		28.5	-0.0138	0.033	-0.0625
	28.5	-0.2279	-0.1391	-0.0889		31.5	-0.0136	0.0306	-0.0639
	31.5	-0.266	-0.1705	-0.0952		34.5	-0.0231	0.0326	-0.0704
	34.5	-0.3051	-0.2019	-0.1055		37.5	-0.0373	0.0303	-0.0801
	37.5	-0.3427	-0.2239	-0.1145		40.5	-0.055	0.0279	-0.0867
	40.5	-0.3787	-0.2508	-0.1192		43.5	-0.0696	0.0214	-0.0937
	43.5	-0.407	-0.282	-0.1213		46.5	-0.0857	0.0131	-0.1001
	46.5	-0.4353	-0.2959	-0.1332		49.5	-0.101	0.0094	-0.1129
	49.5	-0.4907	-0.3409	-0.1444		52.5	-0.0996	0.0038	-0.112
	52.5	-0.5208	-0.3768	-0.1445		55.5	-0.1191	-0.0079	-0.1184
	55.5	-0.5313	-0.3813	-0.1494
	58.5	-0.5644	-0.4138	-0.1468

## Sheet: D
Figure 4D	Cummulative neighbour gains
	WT					hkb
	Time	WT circum	WT radial			Time	hkb circum	hkb radial
	-16.5	2	4			-16.5	3	4
	-13.5	15	20			-13.5	6	10
	-10.5	38	38			-10.5	12	16
	-7.5	66	50			-7.5	26	28
	-4.5	108	68			-4.5	37	35
	-1.5	138	85			-1.5	43	39
	1.5	175	109			1.5	60	52
	4.5	207	128			4.5	66	60
	7.5	247	140			7.5	78	73
	10.5	283	163			10.5	89	78
	13.5	310	179			13.5	105	88
	16.5	334	187			16.5	116	96
	19.5	344	200			19.5	137	109
	22.5	358	204			22.5	146	121
	25.5	368	216			25.5	159	134
	28.5	377	223			28.5	171	144
	31.5	384	225			31.5	183	161
	34.5	396	231			34.5	195	170
	37.5	406	235			37.5	207	178
	40.5	409	238			40.5	215	186
	43.5	416	242			43.5	220	191
	46.5	420	245			46.5	225	196
	49.5	425	248			49.5	234	204
	52.5	430	251			52.5	239	207
	55.5	433	254			55.5	243	215
	58.5	434	255			58.5	254	226
	61.5	438	257			61.5	261	234

## Sheet: E
Figure 4E	Cummulative pp of productive neighbour gains
	WT			WT			hkb			hkb
	Time	WT nearpit		Time	WT farpit		Time	hkb nearpit		Time	hkb farpit
	-16.5	-0.0041		-16.5	0		-16.5	0		-16.5	-0.0029
	-13.5	-0.0033		-13.5	-0.0018		-13.5	-0.002		-13.5	-0.007
	-10.5	-0.0022		-10.5	-0.0009		-10.5	-0.002		-10.5	-0.007
	-7.5	0.0001		-7.5	0.0021		-7.5	-0.0069		-7.5	0.0004
	-4.5	0.0045		-4.5	0.0056		-4.5	-0.0097		-4.5	0.0082
	-1.5	0.0049		-1.5	0.0086		-1.5	-0.0032		-1.5	0.0062
	1.5	0.0067		1.5	0.0102		1.5	-0.005		1.5	0.0139
	4.5	0.0083		4.5	0.0127		4.5	-0.0108		4.5	0.0165
	7.5	0.0131		7.5	0.0177		7.5	-0.0079		7.5	0.0126
	10.5	0.0109		10.5	0.0218		10.5	-0.0032		10.5	0.0163
	13.5	0.0177		13.5	0.0234		13.5	-0.0008		13.5	0.0205
	16.5	0.0225		16.5	0.0275		16.5	0.0022		16.5	0.0218
	19.5	0.0164		19.5	0.0275		19.5	0.0007		19.5	0.033
	22.5	0.0195		22.5	0.0315		22.5	0.0027		22.5	0.0257
	25.5	0.0122		25.5	0.031		25.5	-0.0003		25.5	0.0285
				28.5	0.0319		28.5	-0.0019		28.5	0.0325
				31.5	0.0346		31.5	-0.0103		31.5	0.0325
				34.5	0.0381		34.5	-0.0086		34.5	0.0354
				37.5	0.0418		37.5	-0.0033		37.5	0.037
				40.5	0.0418		40.5	-0.0033		40.5	0.037
				43.5	0.0445		43.5	-0.0033		43.5	0.037
				46.5	0.0454		46.5	-0.0033		46.5	0.037
				49.5	0.0482		49.5	-0.0002		49.5	0.037
				52.5	0.0509		52.5	-0.0141		52.5	0.0516
				55.5	0.0509		55.5	-0.0304		55.5	0.0539
				58.5	0.0509		58.5	-0.0337		58.5	0.0562
				61.5	0.057		61.5	-0.0296		61.5	0.0515

## Sheet: F
Figure 4F	Unipolarity (proportion per minute)
	WT			WT			hkb			hkb
	Time	Unipolarity circum		Time	Unipolarity radial		Time	Unipolarity circum		Time	Unipolarity radial
	-13.5	0.0696		-13.5	0.0666		-13.5	0.0399		-13.5	0.0416
	-10.5	0.0652		-10.5	0.069		-10.5	0.0368		-10.5	0.0418
	-7.5	0.0747		-7.5	0.0784		-7.5	0.0379		-7.5	0.0416
	-4.5	0.0743		-4.5	0.0814		-4.5	0.0401		-4.5	0.0396
	-1.5	0.0743		-1.5	0.0859		-1.5	0.0391		-1.5	0.0427
	1.5	0.0751		1.5	0.0827		1.5	0.0419		1.5	0.0447
	4.5	0.0711		4.5	0.0874		4.5	0.0376		4.5	0.044
	7.5	0.0831		7.5	0.0895		7.5	0.0359		7.5	0.0427
	10.5	0.0804		10.5	0.0966		10.5	0.039		10.5	0.0413
	13.5	0.0859		13.5	0.0977		13.5	0.0354		13.5	0.0402
	16.5	0.0819		16.5	0.0974		16.5	0.0377		16.5	0.0457
	19.5	0.081		19.5	0.0885		19.5	0.0395		19.5	0.0397
	22.5	0.0784		22.5	0.0956		22.5	0.0389		22.5	0.0386
	25.5	0.0777		25.5	0.0917		25.5	0.0356		25.5	0.0393
	28.5	0.0719		28.5	0.0882		28.5	0.0385		28.5	0.0426
	31.5	0.0647		31.5	0.0827		31.5	0.0426		31.5	0.0457
	34.5	0.0627		34.5	0.088		34.5	0.0405		34.5	0.0368
	37.5	0.0768		37.5	0.0871		37.5	0.033		37.5	0.0331
	40.5	0.0574		40.5	0.0595		40.5	0.0351		40.5	0.0395
							43.5	0.0309		43.5	0.0406
							46.5	0.04		46.5	0.0487
							49.5	0.0382		49.5	0.0349
							55.5	0.0434		55.5	0.0668
							58.5	0.0355		58.5	0.0589

## Sheet: G
Figure 4G	Bipolarity (proportion per minute)
	WT			WT			hkb			hkb
	Time	Bipolarity circum		Time	Bipolarity radial		Time	Bipolarity circum		Time	Bipolarity radial
	-13.5	-0.0011		-13.5	0.0011		-13.5	-0.0013		-13.5	0.0013
	-10.5	-0.0111		-10.5	0.0111		-10.5	-0.002		-10.5	0.002
	-7.5	-0.0131		-7.5	0.0131		-7.5	-0.002		-7.5	0.002
	-4.5	-0.0134		-4.5	0.0134		-4.5	-0.0033		-4.5	0.0033
	-1.5	-0.0155		-1.5	0.0155		-1.5	-0.0042		-1.5	0.0042
	1.5	-0.0127		1.5	0.0127		1.5	-0.0051		1.5	0.0051
	4.5	-0.0135		4.5	0.0135		4.5	-0.0036		4.5	0.0036
	7.5	-0.0104		7.5	0.0104		7.5	-0.0024		7.5	0.0024
	10.5	-0.0094		10.5	0.0094		10.5	-0.0001		10.5	0.0001
	13.5	-0.0084		13.5	0.0084		13.5	-0.0046		13.5	0.0046
	16.5	-0.0136		16.5	0.0136		16.5	-0.0056		16.5	0.0056
	19.5	-0.0102		19.5	0.0102		19.5	-0.0057		19.5	0.0057
	22.5	-0.0115		22.5	0.0115		22.5	-0.0025		22.5	0.0025
	25.5	-0.005		25.5	0.005		25.5	-0.0004		25.5	0.0004
	28.5	-0.0096		28.5	0.0096		28.5	-0.0037		28.5	0.0037
	31.5	-0.0178		31.5	0.0178		31.5	-0.0064		31.5	0.0064
	34.5	-0.0107		34.5	0.0107		34.5	0.0001		34.5	-0.0001
	37.5	-0.0136		37.5	0.0136		37.5	-0.0012		37.5	0.0012
	40.5	0.001		40.5	-0.001		40.5	0		40.5	0
							43.5	0.0002		43.5	-0.0002
							46.5	0.0025		46.5	-0.0025
							49.5	-0.0107		49.5	0.0107
							55.5	-0.0117		55.5	0.0117
							58.5	-0.0103		58.5	0.0103

## Sheet: H
Figure 4H	Log of cell shape aspect ratio
	WT				hkb
	Time	Mean log aspect ratio	Standar Error		Time	Mean log aspect ratio	Standar Error
	-16.5	-0.0863	0.0299		-19.3846	0.0064	0.0396
	-13.5	-0.0816	0.0211		-16.1538	-0.0168	0.0426
	-10.5	-0.0618	0.0198		-12.9231	-0.0455	0.038
	-7.5	-0.075	0.0161		-9.6923	-0.0649	0.0322
	-4.5	-0.0664	0.0156		-6.4615	-0.1212	0.0298
	-1.5	-0.0672	0.0159		-3.2308	-0.1208	0.029
	1.5	-0.0629	0.0142		0	-0.1061	0.0273
	4.5	-0.0617	0.0161		3.2308	-0.1243	0.0283
	7.5	-0.0573	0.0157		6.4615	-0.1047	0.0305
	10.5	-0.0438	0.0163		9.6923	-0.1362	0.028
	13.5	-0.0192	0.0185		12.9231	-0.1017	0.0267
	16.5	-0.0107	0.0176		16.1538	-0.1241	0.032
	19.5	-0.0015	0.0181		19.3846	-0.1115	0.0293
	22.5	-0.0135	0.0204		22.6154	-0.0907	0.0293
	25.5	0.0134	0.022		25.8462	-0.099	0.0315
	28.5	0.0141	0.021		29.0769	-0.0921	0.029
	31.5	0.0158	0.022		32.3077	-0.0949	0.0277
	34.5	0.0392	0.0221		35.5385	-0.0997	0.0345
	37.5	0.0568	0.0222		38.7692	-0.0976	0.0332
	40.5	0.0553	0.0259		42	-0.0954	0.0343
	43.5	0.0618	0.0265		45.2308	-0.1068	0.0388
	46.5	0.0555	0.0286		48.4615	-0.1194	0.0406
	49.5	0.0635	0.0349		51.6923	-0.1586	0.0412
	52.5	0.0909	0.0316		54.9231	-0.1376	0.0457
	55.5	0.0948	0.0346		58.1538	-0.1469	0.0446
	58.5	0.1199	0.0462		61.3846	-0.1467	0.0506
	61.5	0.1041	0.049
