# Supplementary material for: Correct regionalization of a tissue primordium is essential for coordinated morphogenesis
Source: eLife journal article supplement (doi:10.7554/elife.72369), 2021-11-01
Supplement: supp [file elife_poa_e72369_Figure_5_source_data_1.xlsx]

## Sheet: M
Figure 5M	Average medial Venus-Hkb intensity [AU]
	Radial distance from pit	mean (t << 0)	se (t<<0)
	45.04	0.32834	0.0132473
	41.12	0.330464	0.01889
	37.2	0.334966	0.0153738
	33.29	0.368945	0.0185867
	29.37	0.362909	0.0159067
	25.45	0.375578	0.0181642
	21.54	0.451033	0.0187553
	17.62	0.504203	0.0203975
	13.7	0.583956	0.0203089
	9.79	0.56689	0.0208393
	5.87	0.594175	0.0276169
	1.95	0.52922	0.0670115
	Radial distance from pit	mean (t = 0)	se (t=0)
	45.04	0.511971	0.0226786
	41.12	0.495292	0.025253
	37.2	0.464134	0.0221749
	33.29	0.431168	0.0178836
	29.37	0.429902	0.0143982
	25.45	0.482557	0.0168762
	21.54	0.506756	0.0149879
	17.62	0.558112	0.0155924
	13.7	0.628043	0.0138786
	9.79	0.645509	0.0160352
	5.87	0.669889	0.022624
	1.95	0.604805	0.0387462
	Radial distance from pit	mean(t>>0)	se (t >> 0)
	45.04	0.437077	0.0642694
	41.12	0.471799	0.0353651
	37.2	0.56012	0.0320304
	33.29	0.543805	0.0268128
	29.37	0.568863	0.020848
	25.45	0.590727	0.0202886
	21.54	0.540354	0.0170251
	17.62	0.540939	0.0178505
	13.7	0.51707	0.0176216
	9.79	0.409204	0.0147832
	5.87	0.332746	0.0193906
	1.95	0.280101	0.0477091

## Sheet: N
Figure 5N	Average medial Fkh-GFP intensity [AU]
	Radial distance from pit	mean (t << 0)	se (t<<0)
	45.04	0.0985154	0.00577292
	41.12	0.110008	0.0187095
	37.2	0.122271	0.0101107
	33.29	0.142759	0.015731
	29.37	0.19029	0.0181506
	25.45	0.249202	0.0190091
	21.54	0.345934	0.0261109
	17.62	0.346845	0.0318185
	13.7	0.427448	0.0353927
	9.79	0.62987	0.0355909
	5.87	0.656211	0.0421682
	1.95	0.513211	0.0485116
	Radial distance from pit	mean (t = 0)	se (t=0)
	45.04	0.206948	0.0518038
	41.12	0.323297	0.0328745
	37.2	0.285215	0.0229191
	33.29	0.315048	0.0237503
	29.37	0.335546	0.0233207
	25.45	0.39955	0.0241534
	21.54	0.441937	0.022805
	17.62	0.492023	0.0232882
	13.7	0.544222	0.0214592
	9.79	0.596798	0.0202031
	5.87	0.568487	0.0296866
	1.95	0.534585	0.0745453
	Radial distance from pit	mean(t>>0)	se (t >> 0)
	45.04	0.491234	0.0497904
	41.12	0.61871	0.0639834
	37.2	0.558354	0.0297677
	33.29	0.594628	0.0279503
	29.37	0.634148	0.0172453
	25.45	0.663827	0.0185694
	21.54	0.652817	0.0187002
	17.62	0.67071	0.021064
	13.7	0.619918	0.0230946
	9.79	0.571045	0.0237387
	5.87	0.444601	0.0315028
	1.95	0.315614	0.061922
