# Supplementary material for: Correct regionalization of a tissue primordium is essential for coordinated morphogenesis
Source: eLife journal article supplement (doi:10.7554/elife.72369), 2021-11-01
Supplement: supp [file elife_poa_e72369_Figure_6_source_data_1.xlsx]

## Sheet: K
Figure 6K	Cell area and Average medial Fog intensity [AU]
	Cell area	Av medial Fog Intensity
	28.4817	19.66
	9.57727	24.85
	26.888	22.84
	8.23148	27.32
	8.59145	26.43
	16.2075	22.34
	10.8694	18.9
	14.196	24.3
	11.8818	28.92
	19.0072	32.13
	10.1881	32.41
	7.55975	23.62
	8.22236	28.11
	14.6234	26.06
	11.206	21.51
	10.4751	29.02
	7.51218	29.22
	8.8889	33.78
	10.5948	22.94
	5.83106	28.04
	7.09656	29.9
	7.61529	26.22
	9.27795	27.63
	11.6049	27.83
	6.86487	35.9
	8.07239	25.75
	6.93538	26.54
	7.87125	27.95
	9.45756	25.76
	8.94877	29.64
	9.12834	26.42
	7.37748	29.33
	6.70409	31.88
	8.15858	26.71
	8.4282	28.98
	6.46467	33.02
	4.54921	35.79
	6.52498	26.91
	5.55095	32.58
	9.4316	21.22
	5.55703	35.17
	6.6143	27.28
	4.8485	22.43
	6.54692	27.51
	7.1578	27.76
	5.83103	32.86
	5.05741	31.71
	3.77105	24.5
	24.1972	28.83
	22.0022	27.31
	40.0078	32.02
	16.7179	30.45
	18.7095	28.42
	8.95621	45.94
	6.59476	38.5
	31.4328	30.28
	28.5843	26.27
	26.0968	28.25
	4.92395	37.15
	17.3652	33.72
	20.0922	27.48
	11.5147	35.12
	23.108	27.31
	11.9512	42.37
	15.6921	33.63
	15.7259	33.76
	12.3053	39.81
	8.69702	40.43
	8.85376	32.89
	13.9676	39.16
	10.1081	44.28
	14.8861	27.56
	14.0599	29.15
	16.1845	29.27
	14.8394	29.15
	12.8848	35.12
	9.79135	41.98
	9.87774	48.72
	8.20745	39.49
	5.89681	39.85
	8.49544	39.39
	5.41404	45.44
	8.55303	38.83
	12.0664	31.85
	12.4017	28.04
	4.11813	39.44
	5.70202	38.04
	11.3988	38.69
	12.0088	36.86
	23.7632	28.29
	8.58183	39.21
	10.8569	30.5
	11.1449	44.86
	29.9481	31.49
	11.404	31.39
	16.1269	36.2
	11.98	32.16
	4.23332	40.9
	32.0058	30.42
	6.91154	32.53
	9.65495	29.82
	12.3852	31.57
	5.38799	32.98
	8.49544	36.61
	10.7417	36.8
	14.5616	34.76
	15.1945	31.78
	8.53823	37.28
	3.94534	35
	13.3911	28.96
	14.2551	35.79
	3.94534	59.05
	10.8569	35.68
	10.6382	29.4
	5.40073	29.66
	7.60269	42.13
	13.6791	39.9
	11.4147	40.98
	9.84894	37.81
	6.19159	33.94
	4.98207	47.13
	7.28592	43.52
	9.99293	37.31
	7.97707	46.56
	8.58183	39.52
	9.82015	36.22
	5.90361	43.18
	7.59636	38.66
	9.12899	46.84
	6.0476	36.71
	3.57096	32.62
	4.31972	37.29
	8.72582	37.33
	5.73082	33.83
	8.00056	34.17
	3.91654	39.1
	5.64443	32.93
	3.61141	54.18
	3.13899	49.64
	5.52971	32.64
	3.39817	34.75
	2.87981	34.89
	1.81853	35.5
	3.48457	43.38
	2.30385	42.5
	3.45577	34.2
	6.83865	41.57
	19.8976	28.91
	12.5831	37.02
	11.6531	29.88
	19.8047	21.27
	20.5707	27.96
	4.75969	45.2
	17.0146	35.45
	15.7676	38.77
	15.811	30.37
	10.2853	31.92
	14.8262	32.41
	21.2272	37.23
	27.9564	30.51
	25.2757	31.79
	13.0755	39.06
	20.0901	27.25
	20.0236	35.08
	19.2577	29.33
	18.6011	26.18
	12.5831	37.51
	19.6953	35.51
	25.3304	34.35
	17.2334	23.74
	6.67453	34.57
	16.5222	31.69
	23.8532	38.37
	11.7625	35.39
	10.723	36.09
	12.7473	29.17
	11.106	41.51
	11.106	38.27
	23.1972	29.64
	20.7432	51.78
	11.7625	36.88
	11.2701	29.79
	11.7078	29.83
	19.9141	36.48
	8.80819	33.19
	11.106	29.33
	11.0513	40.13
	11.6531	35.11
	4.37674	41.5
	9.52501	45.78
	13.5679	33.52
	6.5104	41.24
	12.4737	38.72
	14.115	32.02
	6.40099	45.5
	14.6074	32.26
	5.68975	38
	9.35528	34.21
	9.40999	38.46
	7.16691	50.53
	11.7625	31.38
	11.5983	27.9
	11.3795	28.92
	26.151	31.13
	8.3705	26.64
	11.1607	36.51
	8.20638	42.92
	9.90237	42.02
	6.78394	36.83
	6.12743	37.67
	7.05749	46.5
	11.8719	44.29
	6.01801	41.2
	7.76871	35.17
	9.84766	42.61
	3.72023	43
	5.85388	38.92
	7.93283	36.52
	8.58934	37.54
	7.16691	42.29
	9.95708	35.57
	9.68353	42.03
	9.24586	35.49
	9.62882	34.31
	11.1607	41.85
	10.34	34.68
	5.47093	53.2
	8.37051	31.61
	8.04225	56.43
	5.68976	41
	13.1302	33.97
	7.98755	34.12
	7.87813	55.1
	6.67452	35.58
	12.7472	38.99
	10.6136	52.4
	7.93283	39
	10.8324	35.25
	4.70499	35
	8.58935	34.21
	7.76871	46.79
	10.8871	44.28
	12.1454	35.97
	10.4495	49.69
	4.43145	34
	4.3807	32
	5.08796	45.38
	26.4516	32.68
	28.6601	26.44
	17.4002	22.03
	15.3143	28.42
	29.2011	26.36
	36.5616	27.33
	14.7873	28.81
	28.7917	31.99
	32.0154	34.56
	17.6125	37.42
	22.0405	28.06
	17.0788	25.7
	23.0636	32.46
	21.045	40.39
	21.4564	39.02
	30.7843	32.1
	25.7261	25.19
	23.7237	41.96
	20.6648	41.43
	17.8188	28.79
	30.3664	36.27
	27.6249	30.29
	22.7556	37.46
	23.1153	30.56
	15.0526	29.05
	10.7603	45.14
	19.9974	41.43
	18.5416	48.72
	40.3717	36.95
	20.1226	34.99
	17.524	23.88
	17.4688	35.98
	14.8639	42.23
	18.0624	23.73
	35.5507	38.11
	16.0577	46.15
	16.4729	42.84
	18.3882	33.29
	12.4122	58.72
	18.5786	32.41
	13.9924	36.94
	14.3053	30.49
	18.0053	37.19
	16.5099	48.03
	17.7753	45.49
	13.3316	67.74
	15.4769	37.12
	18.3116	49.45
	23.9815	46.29
	13.9445	40.62
	11.2549	31.32
	7.8635	39.25
	13.1783	45.22
	25.0586	38.99
	13.7913	47.4
	17.1623	39.28
	25.6607	30.12
	17.691	65.48
	16.856	65.96
	20.3006	45.9
	9.50066	44.79
	10.9553	32
	8.79735	45.41
	9.73052	49.11
	13.1017	40.84
	13.4082	48.44
	9.87024	46.07
	14.6341	65
	17.7754	47.36
	11.7992	50.46
	14.9969	56.68
	8.58125	68.92
	41.5851	46.13
	9.88376	56.89
	15.9364	45.62
	9.6539	43.32
	9.88376	54.25
	9.19419	66.18
	9.11757	63.83
	9.6539	52.65
	11.9641	47.74
	7.20211	44
	6.81902	45.71
	8.38918	40.5
	8.50886	54.25
	6.51256	53.33
	5.28667	31.5
	32.2244	38.34
	18.944	31.73
	20.883	28.8
	22.356	41.23
	41.9253	40.31
	25.904	32.89
	21.5781	33.54
	16.3439	31.3
	23.964	37.83
	21.1866	37.43
	30.4442	42.57
	24.6405	40.46
	19.3642	40.13
	19.0501	38.8
	20.9124	34.66
	20.8305	33.87
	28.945	41.72
	30.9297	40.65
	23.9225	31.32
	37.7442	47.57
	11.4657	31.01
	39.3102	32.59
	29.1271	30.38
	18.1599	35.47
	14.2787	33.93
	25.7793	33.34
	12.7832	36.86
	14.4398	30.2
	16.4986	52.34
	22.7701	40.14
	27.4175	39.54
	21.8526	53.85
	15.1396	51.27
	14.2431	49.31
	17.3409	39.46
	18.5473	40.26
	8.33218	44.67
	29.2517	30.88
	18.7296	44.34
	17.6466	45.75
	27.365	38.7
	18.7255	55.93
	43.2275	43.16
	9.54287	44.38
	16.9491	39.95
	17.3658	43.08
	19.6198	50.18
	25.7444	45.22
	9.47165	42.76
	20.8652	41.68
	17.395	40.64
	8.75948	52.42
	16.3727	38.68
	11.5725	43.44
	16.1659	39.93
	21.4358	47.61
	12.3577	47.25
	14.814	42.19
	24.1624	44.75
	12.6407	37.28
	14.9196	40.12
	23.0542	39.45
	11.6682	39.02
	13.5309	44.9
	14.2787	35.14
	14.9552	36.3
	14.3496	40.3
	36.1059	42.38
	15.8487	50.81
	13.0659	47.98
	13.1036	32.03
	15.7386	48.22
	14.2787	38.04
	19.3434	34.66
	15.136	56.15
	20.4146	46.91
	13.3285	51.77
	10.6154	36.77
	7.90491	39.89
	13.6878	46.49
	7.78609	41
	12.5695	35.65
	8.11855	38.87
	20.6169	41.41
	13.709	45.29
	5.94649	43.16
	8.68828	49.15
	7.98928	62.83
	6.76547	45.38
	14.0294	46.37
	15.9166	41.07
	11.9823	23.45
	9.25801	39.34
	5.76845	39.38
	10.0842	35.35
	10.5043	35.49
	11.4301	54.62
	9.57848	48.45
	8.51025	46.61
	13.9457	33.44
	11.3233	51.36
	10.6467	51.44
	6.80106	48.13
	13.1036	54.17
	14.8193	45.68
	10.2194	49.11
	9.08226	55.79
	11.2876	45.05
	13.7776	61.82
	6.44499	44.17
	8.48755	52.98
	13.6021	42.39
	9.258	38.17
	9.97015	42.81
	19.8335	40.21
	9.11558	62.88
	7.19275	50.54
	10.6467	45.66
	9.7209	39.48
	6.23133	53.3
	9.07996	41.69
	6.69101	46.32
	5.34115	42.64
	10.077	41.97
	8.01173	53.11
	20.8656	39
	10.0414	49.47
	5.59042	46.67
	9.37994	57.27
	7.57306	56.38
	4.30853	43
	33.659	22.71
	24.0455	40.15
	33.9914	23.9
	29.6155	28.58
	24.3201	28.94
	24.3571	30.04
	26.4759	32.32
	25.816	39.66
	31.9505	20.68
	30.9074	36.63
	23.3964	37.74
	41.8361	27.8
	33.5522	39.82
	16.0591	32.22
	16.0591	36.07
	22.4071	30.94
	22.9888	22.37
	19.9759	39.85
	28.8993	41.32
	39.2393	35.49
	21.1509	35.34
	19.513	35.52
	19.1926	42.41
	27.0314	34.21
	19.5842	33.3
	28.45	27.08
	30.3729	31.82
	40.9844	40.44
	12.5339	40.31
	23.9721	40.32
	11.9932	39.62
	25.4951	38.09
	25.0678	34.77
	20.4385	27.86
	22.5752	43.84
	15.5977	41.04
	21.9699	38.07
	19.9402	35.21
	13.5309	42.28
	25.7085	49.02
	31.1453	37.42
	29.5408	36.2
	13.2105	39.11
	16.4152	36.99
	18.9077	30.87
	15.6863	41.06
	22.617	44.13
	30.1238	34.18
	33.1507	44.99
	23.4655	44.63
	24.7115	37.97
	18.6178	36.17
	13.5665	41.15
	8.47463	33.45
	14.4641	42.59
	12.8544	44.39
	11.9642	35.39
	17.6258	41.94
	26.5647	48.16
	19.7622	37.39
	13.4774	42.95
	37.53	36.94
	18.1643	40.2
	21.2004	36.93
	20.5456	43.37
	23.097	41.21
	7.91331	44.86
	13.5899	26.61
	14.5991	47.3
	18.5317	44.85
	15.135	51.22
	14.7416	38.7
	12.2847	55.46
	13.2461	39.99
	14.4053	42.6
	14.447	40.99
	7.58312	53.07
	17.8901	60.57
	19.1925	59.2
	10.6467	41.79
	10.4308	54.48
	9.18679	36.81
	10.8247	42
	17.1454	41.05
	9.26096	38.44
	10.3974	44.78
	14.1719	43.99
	10.4688	45.71
	13.9579	31.66
	7.52424	54.82
	12.2847	37.32
	10.8603	48.7
	11.1808	50.86
	7.94864	46.95
	10.2436	55.1
	11.6081	40.71
	11.3589	37.53
	17.7326	45.55
	9.7209	53.64
	9.64969	57.7
	11.911	42.79
	8.75949	43.38
	7.26397	43.33
	9.47165	52.19
	7.29958	47.79
	17.5543	61.17
	5.5548	46.54
	5.96207	37
	9.06957	46.13
	7.26397	42.84
	6.65864	42.07
	7.29849	48.33
	8.22538	57.28
	8.20294	43.71
	7.08593	41.32
	7.79808	53.24
	4.94947	32.09
	5.0915	52
	6.86221	45.82
	4.98508	42
	4.77143	40.6
	5.51919	42.33
	4.94947	51
	20.3361	41.29
	28.5388	55.93
	26.2483	40.85
	19.0147	45.44
	27.8349	56.1
	20.0726	44.73
	22.91	54.24
	15.5218	48.55
	29.368	51.19
	29.3181	53.72
	20.5025	39.6
	15.9596	66.09
	29.2562	56.31
	20.4504	64.67
	14.3778	54.67
	25.2063	44.6
	17.615	59.24
	14.7488	55.75
	17.6324	48.13
	29.1804	41.05
	13.5283	41.22
	21.9823	46.28
	17.0137	68.08
	20.2161	59.7
	18.3516	49.61
	14.7612	66.57
	22.7322	55.48
	36.2294	44.5
	15.3635	50.93
	19.8009	76.39
	20.5672	59.33
	17.9102	73.19
	8.36466	78.2
	18.8943	69.53
	13.7771	58.71
	27.5562	42.37
	23.0302	57.23
	26.1707	55.82
	27.3203	66.45
	12.8914	76.82
	19.8784	60.33
	14.6628	66.28
	15.3516	67.97
	14.2691	52.79
	11.8089	68.44
	33.701	43.89
	10.4066	74.7
	36.1519	46.89
	20.764	57.63
	25.312	63.67
	17.557	61.04
	18.3871	54.13
	19.081	76.58
	26.2833	63.42
	7.57739	53
	20.9519	67.79
	17.4182	50.42
	11.3169	52.41
	19.7842	73.83
	14.6627	91.48
	16.9442	58.75
	13.0882	69.33
	9.84076	76.29
	21.2544	67.9
	9.28147	61.71
	17.2907	65.89
	11.1903	72.23
	14.3827	67.54
	11.9073	95.73
	13.4819	76.8
	16.9564	73.93
	7.98594	63
	15.4034	75.47
	9.48874	65
	13.3834	82.23
	13.2679	43.48
	15.7452	60.93
	12.0311	83.33
	14.958	44.95
	8.06944	82
	14.1707	68.46
	6.88854	88
	7.67579	82
	10.0018	89.67
	11.2185	98.43
	7.38057	78
	9.0535	75.5
	10.4312	89.3
	9.54555	92.33
	10.5296	75.75
	14.3324	86.32
	11.3169	82.73
	10.3328	49.86
	10.5296	74.83
	11.0217	98.42
	7.18376	69.33
	9.84077	95
	7.97101	61
	12.9429	44.5
	8.95511	79
	8.71275	75.33
	17.2214	101.12
	8.8567	91.17
	7.57739	73
	10.0376	96.12
	11.1987	59.88
	6.39649	81
	9.84076	89.67
	11.9351	82.59
	7.87261	65.33
	8.85669	65
	9.84076	74.5
	8.75829	71
	10.2344	101.1
	9.7633	59.25
	25.5817	36.98
	30.6394	34.37
	36.4792	37.5
	32.2624	43.3
	31.6945	42.22
	20.1757	44.21
	23.6194	49.32
	9.00739	34
	18.3416	51.06
	12.4529	37.72
	24.8093	43.49
	23.3614	46.11
	31.5773	58.03
	8.94397	56
	8.49506	59
	26.4531	44.75
	17.4728	43.74
	19.5599	40.52
	10.8119	47.5
	40.8617	43.1
	8.49504	43
	19.1138	39.76
	8.49505	63.14
	14.6733	56.82
	10.7409	46.69
	20.4653	55.42
	11.9703	64.32
	11.948	56.75
	12.6806	37.45
	17.3762	54
	8.01237	48
	9.65342	39.43
	10.9084	48.76
	7.2401	51.4
	7.31646	70.75
	5.69555	46
	10.1361	48
	9.77263	67
	13.3361	54.5
	25.0284	36.32
	22.1064	38.61
	13.3093	57
	17.4194	47.87
	31.6633	28.97
	36.5121	32.89
	40.9255	40.93
	12.2631	29
	14.936	41.95
	17.6658	41.88
	11.6807	35.67
	8.30197	52.75
	22.4926	53.44
	9.65345	57.5
	18.3554	40.74
	26.1937	54.33
	10.9084	43.92
	12.3564	33.6
	12.9152	59.19
	12.0687	42.58
	33.0126	41.9
	15.349	38.08
	10.7127	55.89
	21.197	42.03
	11.1015	67
	21.4838	45.55
	13.901	58.61
	12.3564	38.26
	15.0471	57.73
	9.17077	57
	14.2652	57
	16.379	47.76
	8.49503	41.67
	10.2372	43.71
	11.1162	47.87
	10.4312	51.5
	12.3564	72.43
	9.35323	63
	13.8184	50.24
	12.6971	51.94
	8.66948	51.71
	8.0909	46
	12.7168	59.8
	11.6292	52.59
	9.12184	63.5
	6.7278	57
	9.6309	49.5
	10.3046	51.25
	5.70787	32.92
	17.7734	33.42
	22.6772	30.72
	13.5423	23.92
	9.55106	34.87
	19.3933	30.18
	18.8757	30.06
	24.1487	27.41
	38.6479	24.72
	23.4275	34.16
	10.7826	34.53
	14.4254	42.62
	24.765	29.45
	11.1373	31.76
	17.0851	35.89
	13.883	30.5
	5.7085	26.96
	11.5091	39.5
	24.5109	31.81
	21.3796	34.59
	15.6508	28.41
	23.2023	30.84
	8.5075	42.78
	16.2582	36.39
	24.0245	26.59
	23.6994	34.29
	26.2708	27.62
	22.5849	39.28
	8.73002	46.6
	9.66761	47.75
	13.6439	43.55
	16.7765	31.67
	7.31056	28.95
	17.7496	41.81
	5.50593	44.12
	10.9073	40.87
	6.94226	38.78
	10.7079	29.82
	8.67118	29.34
	9.08362	36.07
	11.4462	34.64
	11.7393	37.39
	15.1894	33.98
	4.27216	35.69
	3.78045	40.11
	11.1837	32.19
	7.89896	35.12
	6.71071	46.66
	4.52996	53.12
	6.22437	43.9
	11.2144	45.48
	5.11871	53.49
	8.54432	32.09
	8.91161	33.9
	8.32335	37.58
	5.24813	50.6
	8.63307	39.24
	4.15512	33.44
	12.6491	43.79
	11.4157	29.78
	11.4892	39.63
	7.56835	42.54
	6.1682	31.05
	4.56679	46.15
	11.262	41.06
	9.07736	32.73
	4.73252	48.94
	4.4374	47.42
	8.5619	44.28
	3.77455	45.81
	5.38632	36.77
	4.69765	36.54
	7.46061	37.73
	6.72128	41.15
	2.7803	41.53
	3.79339	52.54
	4.19851	36.77
	3.38827	36.61
	21.6625	19.73
	26.0665	21.86
	34.4899	28.35
	15.7113	42.38
	35.2198	25.72
	30.7507	23.57
	12.6926	42.44
	37.969	32.33
	15.1265	39.82
	42.849	24.85
	19.4011	31.59
	9.0459	37.5
	34.0099	32.66
	11.6645	35.62
	14.8781	36.25
	13.9259	39.29
	15.8303	45.71
	28.566	28.74
	11.7835	37.33
	29.3461	24.35
	20.585	28.59
	13.4498	35.25
	29.268	27.13
	8.80787	40
	12.3786	36.86
	11.3074	33.67
	15.2352	43.42
	13.2118	38.57
	12.1405	35.7
	17.0206	38.57
	18.3944	20.61
	15.8303	34.32
	23.4827	32.6
	15.2931	24.05
	17.263	41.7
	19.2821	28.91
	8.11957	31
	13.2118	43.7
	15.5923	39.92
	9.0459	36.33
	9.28395	35
	10.9503	43
	21.2862	28.04
	14.5211	31.83
	14.9971	34.94
	19.044	27.75
	12.4976	30.83
	19.5201	30.04
	9.522	29
	18.925	45.1
	9.57443	44.33
	11.7835	39.67
	19.6139	35.65
	10.9503	45.29
	11.7835	44.67
	7.26053	44
	15.5923	38.58
	12.7357	33
	9.61755	44
	11.6906	28
	13.8069	39.36
	8.33175	46
	9.52905	33.6
	10.7122	42
	8.92687	35
	10.8313	37.75
	14.164	39.88
	7.38216	47
	9.99811	37.67
	8.21271	44
	40.3495	20.88
	34.5173	26.44
	19.5201	33.06
	18.0675	37.25
	20.4834	30.16
	23.1356	22.6
	20.4962	20.56
	21.66	16.76
	15.0551	35.86
	12.0215	33.6
	44.2033	31.2
	12.2596	32.7
	21.8405	36.2
	30.9067	21.88
	9.64102	31.5
	18.3299	31.28
	12.3786	27.67
	16.6398	32.57
	27.2845	32.09
	9.9981	37.6
	22.7937	26.86
	35.8195	32.21
	10.7123	45.83
	20.7103	23.53
	29.0421	32.98
	10.1171	32.57
	26.1203	23.72
	10.5932	33.2
	9.76005	42.33
	12.6166	42.22
	16.7825	36.24
	16.9016	33.9
	7.49859	46.33
	11.0326	14
	27.5955	26.51
	13.2804	31.62
	9.64102	35
	14.8781	30.18
	24.6131	40.58
	8.92688	34.33
	13.4498	30.33
	12.8547	41.67
	25.5904	33.84
	16.3727	29.05
	14.3051	39.8
	13.8069	36.5
	20.4723	25.72
	16.5476	30.67
	18.6585	30.65
	26.6969	25.36
	26.1855	35.66
	23.8001	33.64
	17.7394	30.76
	10.2362	41.5
	19.5201	35.52
	14.3847	26.75
	11.5454	49.17
	20.7544	41.41
	11.1883	31.38
	11.2372	42.88
	9.28395	45
	8.46026	40.33
	9.25529	45.67
	8.0937	29

## Sheet: L
Figure 6L	Average medial Fog intensity [AU] and Average medial Myosin intensity
	Av medial Fog Intensity	Av medial Myo Intensity
	0.54539	0.60168
	0.689366	0.734469
	0.633607	0.622149
	0.757887	0.785728
	0.733197	0.753906
	0.619736	0.606324
	0.524307	0.545606
	0.674109	0.567623
	1.09827	0.706088
	0.802273	0.695424
	0.891321	0.675299
	0.899089	0.708668
	0.655245	0.756658
	0.779802	0.775235
	0.722933	0.732405
	0.596711	0.55283
	0.805047	0.756486
	0.810595	0.844898
	0.937094	0.781255
	0.636381	0.784524
	0.77786	0.83819
	0.829459	0.780911
	0.727372	0.673235
	0.766487	0.830793
	0.772035	0.718817
	0.995905	0.712625
	0.714333	0.839566
	0.736249	0.665323
	0.775364	0.710561
	0.714611	0.886008
	0.822246	0.818065
	0.73292	0.819957
	0.813646	0.868291
	0.884386	0.750294
	0.740965	0.788136
	0.803937	0.880675
	0.916011	0.83647
	0.992854	0.753734
	0.746513	0.99764
	0.903805	0.729653
	0.588666	0.624901
	0.975654	1.05664
	0.756777	0.814625
	0.622233	0.841286
	0.763158	0.663431
	0.770093	0.657754
	0.911572	0.827181
	0.87967	0.582415
	0.679657	0.825633
	0.488113	0.54577
	0.462378	0.503547
	0.542122	0.551087
	0.515541	0.577515
	0.481171	0.758291
	0.777798	0.768143
	0.651833	0.664463
	0.512662	0.538732
	0.44477	0.565786
	0.478293	0.512148
	0.628977	0.781279
	0.570904	0.654298
	0.465256	0.735616
	0.594607	0.997241
	0.462378	0.547021
	0.717355	0.773304
	0.56938	0.733583
	0.571581	0.680726
	0.674012	0.8357
	0.684509	0.607227
	0.556852	0.568132
	0.663007	0.747501
	0.749693	0.750003
	0.466611	0.769082
	0.493531	0.584708
	0.495562	0.587054
	0.493531	0.985044
	0.594607	0.77737
	0.710752	0.670249
	0.824865	0.770333
	0.668595	0.698241
	0.67469	0.705122
	0.666901	0.507456
	0.769332	0.752662
	0.65742	0.83226
	0.539244	0.712784
	0.474738	0.699492
	0.667748	0.928277
	0.644045	0.863379
	0.65505	0.712315
	0.624067	0.652265
	0.47897	0.589556
	0.663854	0.82663
	0.516387	0.709344
	0.759513	0.709344
	0.533149	0.682759
	0.531456	0.736711
	0.612892	0.801452
	0.544492	0.627557
	0.692467	0.758448
	0.515033	0.829132
	0.550757	0.646635
	0.504874	0.62224
	0.534503	0.616297
	0.558375	0.577984
	0.619834	0.610511
	0.623051	0.812086
	0.588512	0.847428
	0.538059	0.727641
	0.631178	0.649763
	0.592576	0.780497
	0.490314	0.662586
	0.605951	0.712159
	0.99976	0.998649
	0.604088	0.865725
	0.497763	0.613795
	0.502165	0.807864
	0.713292	0.794259
	0.675536	0.782687
	0.693821	0.911232
	0.640151	0.832572
	0.574629	0.741089
	0.797945	0.818029
	0.736825	0.570165
	0.631686	0.662273
	0.788295	0.747345
	0.669102	0.708562
	0.613231	0.772053
	0.731069	0.74234
	0.654542	0.753287
	0.793035	0.738118
	0.621527	0.534197
	0.55228	0.5894
	0.631347	0.882301
	0.632024	0.810523
	0.572767	0.769551
	0.578523	0.921397
	0.661992	0.782687
	1.01178	0.674002
	0.557529	0.828194
	0.917307	0.810992
	0.840441	1.06621
	0.552619	0.734678
	0.588343	0.708875
	0.590713	0.715912
	1.03277	0.916392
	0.601041	0.828819
	0.734455	1.80917
	0.719556	0.930467
	0.579031	0.902787
	0.72105	0.899528
	0.501457	0.468792
	0.642129	0.647981
	0.518282	0.738599
	0.368938	0.41879
	0.484979	0.709246
	0.784014	1.06148
	0.614896	0.591323
	0.672483	0.765734
	0.526781	0.616239
	0.553667	0.846113
	0.562166	0.53842
	0.645771	0.527839
	0.52921	0.597979
	0.551412	0.721534
	0.677513	0.521525
	0.472664	0.691157
	0.608478	0.544563
	0.508742	0.610607
	0.454104	0.625625
	0.650628	0.737234
	0.615937	0.676651
	0.595816	0.586545
	0.411781	0.667777
	0.599632	0.421008
	0.549677	0.512309
	0.665545	0.866933
	0.613856	0.663169
	0.625997	0.583814
	0.505967	0.795086
	0.72001	0.739794
	0.66381	0.554803
	0.514119	0.618457
	0.898148	0.704297
	0.6397	0.708905
	0.516721	0.600368
	0.517415	0.552755
	0.632762	0.749863
	0.575696	0.892702
	0.508742	0.649176
	0.696073	0.544563
	0.608999	0.682624
	0.719836	0.887411
	0.794075	0.98059
	0.58142	0.764027
	0.715326	0.628356
	0.671616	0.783311
	0.555401	0.78809
	0.789218	0.770853
	0.559564	0.86113
	0.659127	0.766075
	0.593388	0.875807
	0.667106	0.76215
	0.876466	0.921543
	0.5443	0.734162
	0.483938	0.763344
	0.50163	0.772731
	0.539964	0.696789
	0.462083	0.693546
	0.633282	0.880244
	0.744467	0.743719
	0.728856	0.923249
	0.638833	0.852256
	0.653403	0.695423
	0.806564	0.814029
	0.76823	0.938267
	0.714633	0.679211
	0.61004	0.835532
	0.73909	0.714537
	0.745854	0.921543
	0.675085	0.783653
	0.633456	0.575452
	0.651148	0.875295
	0.733539	0.490636
	0.616978	0.854645
	0.729029	0.627161
	0.61559	0.71795
	0.595122	0.850379
	1.04767	0.866933
	0.725907	0.836897
	0.60154	0.748327
	0.922778	0.701396
	0.54829	0.666241
	0.978804	0.82973
	0.711164	0.563165
	1.00135	0.826828
	0.589225	0.844918
	0.591827	0.713684
	0.955734	0.795598
	0.617151	0.595931
	0.676299	0.684843
	0.908902	0.690645
	0.676473	0.564018
	0.611427	0.836897
	0.607091	0.831266
	0.593388	0.696106
	0.811594	0.98059
	0.768057	0.873588
	0.623916	0.856523
	0.861896	1.00124
	0.589745	0.767952
	0.555054	0.682624
	0.787137	0.804131
	1.00951	1.13316
	0.473102	0.497767
	0.382767	0.414774
	0.318924	0.295567
	0.411431	0.285381
	0.381609	0.468908
	0.395651	0.361583
	0.417077	0.352907
	0.463113	0.506443
	0.500318	0.510593
	0.541722	0.352341
	0.406219	0.438163
	0.372054	0.417415
	0.469917	0.419112
	0.584718	0.573403
	0.564885	0.445331
	0.464706	0.483998
	0.364671	0.510027
	0.607447	0.5602
	0.599774	0.508329
	0.416787	0.460986
	0.525074	0.531718
	0.438503	0.457968
	0.542301	0.443444
	0.442411	0.331782
	0.420551	0.410247
	0.653483	0.424771
	0.599774	0.593208
	0.70531	0.741652
	0.534918	0.428166
	0.506544	0.411002
	0.345706	0.356679
	0.520876	0.621312
	0.611356	0.768247
	0.343535	0.457214
	0.551711	0.588681
	0.668105	0.51097
	0.620186	0.770699
	0.481933	0.5287
	0.850078	0.815591
	0.469193	0.523985
	0.534773	0.524362
	0.441398	0.429298
	0.538392	0.728448
	0.695321	0.751271
	0.65855	0.703928
	0.980659	0.652246
	0.537379	0.563218
	0.715878	0.706946
	0.670131	0.614711
	0.588048	0.951962
	0.453414	0.407984
	0.568215	0.573026
	0.654641	0.662054
	0.564451	0.640363
	0.686201	0.84709
	0.568649	0.643758
	0.436041	0.816345
	0.947941	0.742218
	0.95489	0.704116
	0.664485	0.670731
	0.648416	0.604903
	0.463258	0.507386
	0.657392	0.687895
	0.710956	0.746556
	0.591233	0.540583
	0.701257	0.618106
	0.666947	1.001
	0.940993	0.845015
	0.685622	0.797483
	0.7305	0.795031
	0.820545	0.655264
	0.997742	0.578496
	0.667815	0.530021
	0.823586	0.608864
	0.660432	0.635459
	0.627135	0.738634
	1.00715	0.47551
	0.785367	0.807103
	0.958075	0.817854
	0.924055	0.555296
	0.762204	0.765606
	1.08822	0.90858
	0.691123	0.802953
	0.63698	0.829926
	0.661735	1.00515
	0.586311	0.845015
	0.785367	0.91952
	0.772048	0.999683
	0.456019	0.801633
	0.599745	0.489089
	0.496346	0.382993
	0.450512	0.386345
	0.644952	0.519985
	0.630561	0.494044
	0.514491	0.482093
	0.524659	0.519548
	0.489619	0.535433
	0.591767	0.573615
	0.58551	0.514155
	0.665914	0.604511
	0.632907	0.565746
	0.627745	0.588335
	0.60694	0.385325
	0.542179	0.496521
	0.529821	0.501331
	0.652617	0.486903
	0.63588	0.540679
	0.489932	0.428754
	0.744128	0.524211
	0.485083	0.531498
	0.509799	0.521588
	0.475228	0.474807
	0.55485	0.596642
	0.53076	0.503808
	0.521531	0.50818
	0.576593	0.561811
	0.472412	0.462565
	0.818744	0.575947
	0.627902	0.546946
	0.618516	0.575219
	0.842364	0.58848
	0.802006	0.625643
	0.771346	0.658725
	0.617265	0.55773
	0.629779	0.604657
	0.698764	0.450469
	0.483049	0.452218
	0.693601	0.566037
	0.715658	0.959815
	0.605376	0.563705
	0.874901	0.696033
	0.675143	0.780123
	0.694227	0.81131
	0.62493	0.656685
	0.673892	0.622
	0.784955	0.644006
	0.707367	0.632347
	0.668886	0.616462
	0.651992	0.713084
	0.635723	0.586586
	0.819995	0.80723
	0.605063	0.51022
	0.679523	0.457464
	0.624617	0.637156
	0.744753	0.726201
	0.739122	0.688747
	0.659969	0.545488
	0.700015	0.58848
	0.583163	0.649835
	0.627589	0.659308
	0.617108	0.512698
	0.610382	0.619376
	0.702361	0.570846
	0.549688	0.545926
	0.567833	0.676359
	0.630405	0.476993
	0.662942	0.658288
	0.79481	1.07801
	0.750541	0.828216
	0.501039	0.497104
	0.754296	0.65683
	0.595052	0.588918
	0.542179	0.630015
	0.878343	0.649398
	0.733803	0.696325
	0.809827	0.624623
	0.575186	0.392758
	0.623991	0.735091
	0.727233	0.711336
	0.641355	0.777208
	0.557666	0.576384
	0.608035	0.799651
	0.647768	0.686852
	0.708462	0.535141
	0.675143	0.512406
	0.768843	1.25828
	0.982837	0.750538
	0.70987	0.731739
	0.725356	0.759574
	0.64245	0.641965
	0.366824	0.567057
	0.615388	0.551318
	0.616013	0.568369
	0.552973	0.380661
	0.555163	0.611507
	0.854409	0.633513
	0.757893	0.769047
	0.729111	0.830402
	0.523095	0.572158
	0.803414	0.577405
	0.804665	0.700405
	0.752888	0.675193
	0.84737	0.639488
	0.714563	0.653041
	0.768218	0.843081
	0.872711	0.808833
	0.704708	0.845995
	0.967038	0.837105
	0.690942	0.42205
	0.828755	0.658579
	0.663098	0.761031
	0.597085	0.674902
	0.669668	0.534413
	0.628997	0.701571
	0.983619	1.11838
	1.05088	0.681606
	0.790587	0.503371
	0.71425	0.814954
	0.617577	0.727367
	0.833761	0.47845
	0.652148	0.757825
	0.724574	0.656539
	0.667009	0.900938
	0.656528	0.897731
	0.830789	0.715708
	0.610069	0.563851
	0.773849	0.822532
	0.730049	0.646046
	0.895863	0.72518
	1.0318	0.664992
	0.881941	0.88855
	0.67264	0.45178
	1.06825	0.832733
	0.370806	0.308516
	0.655564	0.547076
	0.390236	0.374438
	0.46665	0.34233
	0.472528	0.465798
	0.490489	0.362649
	0.527717	0.58058
	0.647563	0.613774
	0.33766	0.353032
	0.59809	0.465333
	0.616214	0.540562
	0.453915	0.389639
	0.650176	0.559795
	0.526084	0.571584
	0.588946	0.646192
	0.505184	0.431984
	0.365254	0.389949
	0.650665	0.544284
	0.674667	0.567396
	0.579476	0.51047
	0.577027	0.462541
	0.579966	0.511246
	0.692465	0.509384
	0.558576	0.485342
	0.543718	0.493873
	0.442159	0.487979
	0.519553	0.481154
	0.660299	0.634869
	0.658176	0.55964
	0.658339	0.62975
	0.64691	0.543043
	0.621928	0.651466
	0.56772	0.623081
	0.454894	0.542423
	0.715814	0.704669
	0.670096	0.484566
	0.621602	0.447805
	0.574904	0.568016
	0.690342	0.591903
	0.800392	0.630991
	0.610989	0.494649
	0.591069	0.46192
	0.638583	0.703738
	0.603968	0.543819
	0.504041	0.661393
	0.670422	0.638592
	0.720549	0.707151
	0.558086	0.533737
	0.734591	0.628199
	0.728713	0.694587
	1.06	0.835738
	0.619969	0.609121
	0.590579	0.495579
	0.671892	0.653792
	0.546167	0.849232
	0.695404	0.562742
	0.724794	0.558089
	0.577843	0.498526
	0.684791	0.646192
	0.78635	0.57298
	0.610499	0.576082
	0.701282	0.673336
	0.603151	0.639522
	0.65638	0.605398
	0.602988	0.666201
	0.708139	0.677059
	0.672871	0.571894
	0.732468	0.742361
	0.434484	0.517295
	0.772308	0.842718
	0.732305	0.604777
	0.836313	0.72049
	0.631888	0.718629
	0.905543	0.701567
	0.652951	0.643555
	0.695567	0.640453
	0.669279	0.701722
	0.86652	0.547541
	0.988979	0.885218
	0.96661	0.710873
	0.682341	0.917791
	0.889542	0.756941
	0.601029	0.677369
	0.68577	0.647898
	0.670259	0.717388
	0.627643	0.913758
	0.731162	0.58089
	0.718263	0.701412
	0.746347	0.617962
	0.51694	0.641073
	1.16385	0.661083
	0.895093	0.906933
	0.609356	0.789359
	0.795167	0.738793
	0.830435	0.794788
	0.766593	0.852334
	0.899665	0.668528
	0.664707	0.679696
	0.612785	0.743602
	0.743734	0.674888
	0.875827	0.943229
	0.942118	0.743136
	0.698669	0.865984
	0.708303	0.693811
	0.707486	0.965876
	0.852151	0.820692
	1.00122	0.701567
	0.780309	0.713975
	0.998775	0.869707
	0.759899	1.32806
	0.604131	0.64371
	0.753204	0.749031
	0.699486	0.471537
	0.686913	0.789049
	0.789126	0.64371
	0.93526	1.06964
	0.713691	0.658136
	0.674667	0.834807
	0.869295	0.774159
	0.523961	0.592213
	0.849049	0.730572
	0.748143	0.892353
	0.68577	0.848612
	0.662911	0.766248
	0.691158	1.03412
	0.832721	0.721266
	0.407874	0.539834
	0.552492	0.537926
	0.403528	0.42038
	0.448869	0.472092
	0.554171	0.544414
	0.441855	0.4158
	0.535798	0.550138
	0.47959	0.544223
	0.505669	0.482778
	0.530661	0.457017
	0.39118	0.353401
	0.652856	0.471711
	0.556246	0.715962
	0.638828	0.640588
	0.540046	0.477817
	0.440571	0.445187
	0.585189	0.582387
	0.550714	0.40187
	0.475442	0.477817
	0.405503	0.459498
	0.407183	0.400725
	0.457167	0.465032
	0.672513	0.507204
	0.589733	0.573419
	0.490061	0.601279
	0.657597	0.428013
	0.548047	0.444614
	0.439583	0.549184
	0.503101	0.467513
	0.754602	0.623795
	0.586078	0.566549
	0.722991	0.416945
	0.772481	0.732755
	0.686837	0.64574
	0.579954	0.654327
	0.418543	0.511783
	0.565334	0.574563
	0.551406	0.783895
	0.656412	0.68524
	0.758849	0.712909
	0.595957	0.582769
	0.654732	0.486976
	0.671427	0.570938
	0.521474	0.513119
	0.676069	0.422097
	0.433558	0.646122
	0.737908	0.444614
	0.463193	0.616926
	0.569285	0.510447
	0.62895	0.499952
	0.60297	0.461597
	0.534711	0.442324
	0.756479	0.685622
	0.626481	0.812518
	0.523549	0.318099
	0.669649	0.751646
	0.498063	0.492892
	0.517721	0.496136
	0.729313	0.733327
	0.903665	0.613873
	0.580349	0.450339
	0.684861	0.473046
	0.753614	0.646122
	0.670735	0.634291
	0.609589	0.607957
	0.65088	0.738098
	0.713508	0.74573
	0.667179	0.821868
	0.945648	0.828165
	0.758652	0.601469
	0.730301	0.520943
	0.622332	0.5343
	0.745514	0.975098
	0.642088	0.496136
	0.812291	0.567312
	0.429508	0.63887
	0.601884	0.617689
	0.823157	0.567312
	0.444029	0.433928
	1.03663	0.580861
	0.810019	0.549566
	0.676267	0.638489
	0.869289	0.954107
	0.810019	0.524759
	0.885785	0.494609
	0.972319	0.765957
	0.770506	0.677416
	0.74581	0.491365
	0.88213	1.01517
	0.912062	0.566167
	0.74828	0.739433
	0.852693	0.774735
	0.81723	0.728938
	1.00057	0.728747
	0.492531	0.665204
	0.739192	0.5343
	0.97222	0.758515
	0.684861	0.547085
	0.938437	0.707948
	0.602575	0.610629
	0.439583	0.62017
	0.780384	1.0146
	0.744131	0.629711
	0.998892	0.885793
	0.900603	0.839615
	0.721114	0.496136
	0.9495	0.951818
	0.591511	0.581433
	0.800141	0.858697
	0.885785	0.572464
	0.815847	0.765576
	0.645348	0.70604
	0.642088	0.97319
	1.25454	1.01135
	0.735932	0.791909
	0.701358	0.97796
	0.998694	0.803358
	0.585288	0.698788
	0.495491	0.571622
	0.46052	0.676345
	0.502459	0.680023
	0.580172	0.686024
	0.565701	0.608208
	0.592365	0.614208
	0.660834	0.849787
	0.455563	0.658149
	0.684148	0.845722
	0.505406	0.79036
	0.582718	0.799652
	0.617823	0.833527
	0.777538	0.617499
	0.750338	0.716221
	0.790535	0.745257
	0.599601	0.797522
	0.586068	0.747774
	0.542923	0.650019
	0.636448	0.83043
	0.577493	0.769261
	0.576153	0.720093
	0.53274	0.844173
	0.846006	0.680217
	0.761325	0.827526
	0.625595	0.537166
	0.742567	0.815525
	0.861817	0.669377
	1.18446	0.704607
	0.760387	0.891986
	0.501789	0.753194
	0.723541	0.802168
	0.643147	0.987224
	0.528319	0.647116
	0.65333	0.709446
	0.688703	0.789779
	0.947972	0.904955
	0.616349	1.0453
	0.643147	0.890437
	0.897726	0.79849
	0.73024	0.868757
	0.501225	0.44368
	0.532828	0.60652
	0.786615	0.592023
	0.660618	0.692492
	0.399794	0.519537
	0.453891	0.55342
	0.564845	0.7021
	0.400208	0.370857
	0.578921	0.539429
	0.577955	0.608375
	0.492255	0.643943
	0.727964	1.35279
	0.737486	0.646135
	0.793515	0.623715
	0.562223	0.476383
	0.749768	0.620175
	0.606107	0.594215
	0.463689	0.632986
	0.816837	0.502512
	0.587615	0.334277
	0.578231	0.550217
	0.525514	0.728229
	0.771297	0.576852
	0.580025	0.706315
	0.924617	0.737163
	0.628602	0.600957
	0.808833	0.552577
	0.527998	0.591855
	0.796689	0.985301
	0.786615	0.621355
	0.786615	0.484475
	0.6591	0.618995
	0.575057	0.629278
	0.603209	0.614106
	0.660618	0.5664
	0.710713	0.563366
	0.999553	0.600789
	0.869416	0.640572
	0.693325	0.41654
	1.01073	0.653383
	0.716786	0.50858
	0.713611	0.681535
	0.634812	0.640572
	0.825256	0.664172
	0.725756	0.570109
	0.876317	0.446715
	0.786615	0.927143
	0.683113	0.640572
	0.707263	0.6785
	0.590453	0.63094
	0.599421	0.588743
	0.550994	0.647452
	0.429029	0.512788
	0.625428	0.765971
	0.541308	0.571864
	0.539156	0.699373
	0.491626	0.583605
	0.443378	0.605071
	0.612694	0.694419
	0.61933	0.723407
	0.764432	0.651304
	0.528215	0.645434
	0.569647	0.561223
	0.643723	0.669101
	0.547048	0.54838
	0.483554	0.648736
	0.708472	0.645617
	0.570544	0.772759
	0.620406	0.772575
	0.509562	0.694969
	0.553146	0.635343
	0.767302	0.734231
	0.652691	0.615529
	0.476918	0.670935
	0.615025	0.69185
	0.495392	0.599934
	0.704526	0.706528
	0.835817	0.739001
	0.856444	0.700106
	0.781113	0.772942
	0.568033	0.741937
	0.519247	0.799545
	0.749904	0.723774
	0.791336	0.638278
	0.733044	0.658093
	0.695558	0.904121
	0.534851	0.737533
	0.526242	0.804315
	0.646951	0.856053
	0.621303	0.645067
	0.670627	0.80193
	0.609465	0.694235
	0.640136	0.642131
	0.719413	0.749642
	0.57736	0.716985
	0.629912	0.796793
	0.836894	0.815507
	0.95276	0.734231
	0.78739	0.709463
	0.815729	0.664881
	0.959396	0.966866
	0.575566	0.793674
	0.60803	0.848347
	0.674035	0.700657
	0.907561	0.79239
	0.703809	0.850365
	0.59978	0.710381
	0.785417	0.764686
	0.534134	0.490221
	0.710804	0.838807
	0.762997	0.757898
	0.556913	0.917697
	1.05607	0.689832
	0.827746	0.774043
	0.736452	0.766888
	0.587045	0.879353
	0.877788	0.776795
	0.850525	0.739735
	0.794206	0.574432
	0.821648	0.735148
	0.659507	0.787987
	0.655381	0.81569
	0.676725	0.889076
	0.738066	1.11144
	0.744882	0.785235
	0.942357	0.868345
	0.659507	0.75643
	0.656637	0.927604
	1.32726	1.04576
	0.407224	0.323871
	0.451187	0.342509
	0.585139	0.446545
	0.874716	0.735584
	0.530857	0.384367
	0.486481	0.420879
	0.875955	0.616118
	0.667286	0.691434
	0.821878	0.712669
	0.5129	0.545233
	0.652012	0.51468
	0.773994	0.450669
	0.674097	0.544775
	0.735191	0.544164
	0.748194	0.993
	0.810939	0.691892
	0.943447	0.654769
	0.593189	0.607716
	0.770485	0.776526
	0.50258	0.456475
	0.590093	0.587856
	0.727554	0.5958
	0.559959	0.583731
	0.825593	0.779123
	0.760784	0.678754
	0.694943	0.7944
	0.896182	1.00507
	0.796078	0.767054
	0.736842	0.478168
	0.796078	0.730695
	0.425387	0.496806
	0.708359	0.674323
	0.672859	0.569524
	0.496388	0.437226
	0.860681	0.628034
	0.596698	0.687462
	0.639835	0.738334
	0.901961	0.664546
	0.823942	0.743833
	0.749845	0.90638
	1.13519	0.499097
	0.722394	0.68242
	0.887513	0.667143
	0.578741	0.661338
	0.656966	0.507499
	0.721156	0.465946
	0.572755	0.60848
	0.636326	0.537289
	0.620021	0.556997
	0.598555	0.702739
	0.930857	0.860244
	0.914964	0.616118
	0.818782	0.672185
	0.73581	0.803413
	0.934778	0.632923
	0.921981	0.606036
	0.908153	0.809677
	0.796285	0.655227
	0.681115	0.685934
	0.908153	0.824954
	0.577915	0.702739
	0.812384	0.672185
	0.949432	0.565246
	0.693498	0.571357
	1.02167	0.643159
	0.866873	0.718015
	0.722394	0.565246
	0.779154	0.702739
	0.823117	0.708544
	0.970072	0.931892
	0.777503	1.2883
	0.908153	0.565246
	0.413867	0.457179
	0.524073	0.65967
	0.655289	0.871046
	0.73834	0.847539
	0.597808	0.849945
	0.447959	0.551761
	0.407524	0.411831
	0.332204	0.398134
	0.710789	0.725748
	0.665993	0.575638
	0.618422	0.696319
	0.648154	0.655228
	0.717528	0.664297
	0.433688	0.590075
	0.624368	0.652452
	0.620008	0.825328
	0.548453	0.717234
	0.645577	0.749255
	0.636063	0.772762
	0.745278	0.795898
	0.532398	0.505488
	0.638441	0.660225
	0.908406	0.799045
	0.466393	0.659855
	0.653704	0.672442
	0.645577	0.745738
	0.470159	0.612472
	0.658064	0.603402
	0.839032	0.771281
	0.836852	0.740371
	0.718321	0.998575
	0.671939	0.908805
	0.918317	0.771281
	0.277497	0.370185
	0.52546	0.63894
	0.626747	0.699835
	0.693742	0.505858
	0.598204	0.586929
	0.804345	0.832177
	0.680462	0.54917
	0.601177	0.653932
	0.82595	0.633942
	0.67075	0.73963
	0.575806	0.81885
	0.788884	0.798305
	0.723474	0.51937
	0.509802	0.638014
	0.607917	0.637459
	0.60752	0.536769
	0.502666	0.72834
	0.706824	0.747034
	1.01088	0.962482
	0.666786	0.92824
	0.609701	0.705943
	0.82258	0.874563
	0.704049	0.635053
	0.530217	1.00061
	0.974609	0.737224
	1.1421	0.623577
	0.820796	0.876969
	0.62199	0.564533
	0.849934	0.832917
	0.891955	0.573787
	0.79939	0.623207
	0.905235	1.14757
	0.574815	0.795898

## Sheet: P
Figure 6P	Average medial Fog intensity [AU] in hkb mutant as a function of radial distance
	WT				hkb -/-
	Radial distance	mean intensity	se		Radial distance	mean intensity	se
	45.04	0.479074	0.0161205		45.04	0.542126	0.0187869
	41.12	0.599889	0.0320318		41.12	0.602284	0.0234906
	37.2	0.547484	0.0175404		37.2	0.642318	0.0194513
	33.29	0.554007	0.0160332		33.29	0.642397	0.0181325
	29.37	0.635491	0.0158831		29.37	0.660407	0.014387
	25.45	0.62786	0.0142949		25.45	0.672105	0.0172471
	21.54	0.713411	0.0132923		21.54	0.665281	0.0165195
	17.62	0.713465	0.0129088		17.62	0.675004	0.02124
	13.7	0.714113	0.0120911		13.7	0.608128	0.0172568
	9.79	0.772906	0.0145149		9.79	0.581941	0.0148842
	5.87	0.749496	0.0191197		5.87	0.595226	0.0216394
	1.95	0.698414	0.0392514		1.95	0.705352	0.058324

## Sheet: T
Figure 6T	Average medial Fog intensity [AU] in fkh mutant as a function of radial distance
	WT				fkh -/-
	Radial distance	mean intensity	se		Radial distance	mean intensity	se
	45.04	0.479074	0.0161205		41.12	0.7497	0.027106
	41.12	0.599889	0.0320318		37.2	0.804709	0.0333001
	37.2	0.547484	0.0175404		33.29	0.804751	0.0189242
	33.29	0.554007	0.0160332		29.37	0.785418	0.0149835
	29.37	0.635491	0.0158831		25.45	0.774115	0.0122064
	25.45	0.62786	0.0142949		21.54	0.780023	0.0119218
	21.54	0.713411	0.0132923		17.62	0.761418	0.0146441
	17.62	0.713465	0.0129088		13.7	0.747501	0.0123444
	13.7	0.714113	0.0120911		9.79	0.753021	0.0248779
	9.79	0.772906	0.0145149		5.87	0.720745	0.0133233
	5.87	0.749496	0.0191197		1.95	0.746967	0.0339949
	1.95	0.698414	0.0392514
