# Supplementary material for: Correct regionalization of a tissue primordium is essential for coordinated morphogenesis
Source: eLife journal article supplement (doi:10.7554/elife.72369), 2021-11-01
Supplement: supp [file elife_poa_e72369_Figure_7_figure_supplement_1_source_data_1.xlsx]

## Sheet: E
Figure 7 -figure supplement E	Ratio of medial over junctional myosin in UAS-Fog x fkhGal4
	WT	UAS-Fog
	0.487052	0.770339
	0.566751	0.757455
	0.375307	0.637632
	0.476223	0.77977
	0.563196	0.757004
	0.527204	0.826625
	0.470817	0.748792
	0.505958	0.628533
	0.407244	0.80512
	0.413149	0.624291
	0.399183	0.590762
	0.577468	0.634173
	0.54935	0.645754
	0.553383	0.791632
	0.486579	0.858304
	0.481816	0.734787
	0.475524	0.672756
	0.485615	0.636815
	0.514366	0.706558
	0.412352	0.601048
	0.501412	0.739297
	0.550667	0.653223
	0.420233	0.737713
	0.415048	0.632272
	0.406135	0.690008
	0.433208	0.761655
	0.364242	0.736036
	0.557698	0.659557
	0.514411	0.579009
	0.672914	0.54291
	0.395803	0.565452
	0.560262	0.664256
	0.553468	0.687404
	0.565125	0.724148
	0.56836	0.641544
	0.477846	0.657224
	0.438548	0.565015
	0.522109	0.684511
	0.589922	0.649662
	0.469168	0.616816
	0.573934	0.68587
	0.47179	0.638434
	0.652089	0.686582
	0.529178	0.660408
	0.691767	0.669619
	0.455267	0.630148
	0.40631	0.816607
	0.504402	0.626699
	0.47334	0.55399
	0.412252	0.619378
	0.39343	0.573058
	0.512953	0.607675
	0.506322	0.753483
	0.635464	0.672639
	0.424637	0.643628
	0.469199	0.686148
	0.527497	0.747028
	0.452915	0.530869
	0.748669	0.777578
	0.44019	0.634773
	0.453615	0.625
	0.520413	0.479291
	0.612007	0.561547
	0.54178	0.834559
	0.392971	0.705891
	0.491082	0.624626
	0.580825	0.737616
	1.27267	0.742797
	0.839323	0.69137
	0.60851	0.75732
	0.489815	0.679002
	0.706358	0.678629
	0.438868	0.68484
	0.538723	0.787492
	0.551634	0.751882
	0.499023	0.618558
	0.548747	0.619082
	0.483635	0.898878
	0.524305	0.740708
	0.458768	0.680102
	0.548296	0.630882
	0.531781	0.644115
	0.578751	0.699904
	0.415643	0.700988
	0.475196	0.728495
	0.401782	0.701403
	0.414136	0.503554
	0.453981	0.736585
	0.452684	0.627182
	0.466548	0.692166
	0.45767	0.7439
	0.459808	0.633562
	0.414403	0.710064
	0.561011	0.802196
	0.443762	0.665324
	0.775388	0.707854
	0.815009	0.778486
	0.415744	0.573073
	0.501063	0.70209
	0.556911	0.659386
	0.464467	0.779023
	0.508893	0.573032
	0.522435	0.664814
	0.605654	0.597835
	0.383197	0.686606
	0.597134	0.558325
	0.431061	0.743033
	0.464256	0.642736
	0.484389	0.737653
	0.529643	0.77832
	0.500194	0.711902
	0.562389	0.710092
	0.628105	0.722462
	0.472696	0.712842
	0.440062	0.647797
	0.412406	0.659753
	0.545378	0.728144
	0.424239	0.652141
	0.435228	0.681657
	0.383006	0.528676
	0.468998	0.721519
	0.58348	0.727019
	0.523173	0.67921
	0.543517	0.655117
	0.399456	0.722992
	0.483738	0.749471
	0.509466	0.723391
	0.646757	0.709655
	0.476071	0.737758
	0.524842	0.744538
	0.570014	0.863764
	0.414912	0.648447
	0.520795	0.604666
	0.742043	0.700879
	0.414871	0.68098
	0.686461	0.628708
	0.508195	0.593477
	0.634692	0.636286
	0.561071	0.592794
	0.589079	0.66065
	0.504995	0.702455
	0.471504	0.749297
	0.569214	0.655218
	0.600878	0.641192
	0.579066	0.608654
	0.509408	0.651903
	0.605263	0.724479
	0.607861	0.639258
	0.507001	0.771306
	0.653326	0.727413
	0.520089	0.750242
	0.445266	0.686099
	0.682288	0.746401
	0.630239	0.70082
	0.438772	0.691238
	0.498897	0.648626
	0.531735	0.720958
	0.687726	0.636805
	0.533665	0.779569
	0.520415	0.637522
	0.615707	0.603516
	0.553145	0.650836
	0.43833	0.690503
	0.547898	0.635318
	0.50715	0.574792
	0.581106	0.659336
	0.519657	0.672237
	0.448877	0.766278
	0.537459	0.728241
	0.386434	0.745029
	0.581486	0.677154
	0.561386	0.732
	0.517444	0.731247
	0.552941	0.655644
	0.504996	0.7847
	0.512801	0.607285
	0.519721	0.671545
	0.577361	0.64469
	0.549935	0.763484
	0.594388	0.707058
	0.458543	0.574411
	0.448864	0.768764
	0.536478	0.71044
	0.468809	0.574507
	0.461558	0.585815
	0.436767	0.639201
	0.555764	0.804288
	0.474207	0.767767
	1.11005	0.608511
	0.540341	0.584542
	0.42181	0.652778
	0.513036	0.651499
	0.547902	0.658431
	0.446248	0.608299
	0.519284	0.742104
	0.461283	0.743534
	0.626547	0.764243
	0.516609	0.691506
	0.575162	0.737842
	0.50994	0.956054
	0.530519	0.63048
	0.550293	0.761871
	0.470314	0.54611
	0.516752	0.674262
	0.736961	0.733512
	0.516656	0.881784
	0.397061	0.720459
	0.660455	0.800107
	0.475079	0.664146
	0.643511	0.666831
	0.386734	0.663792
	0.451443	0.719169
	0.454852	0.620793
	0.459274	0.61861
	0.464276	0.577135
	0.522033	0.791554
	0.349057	1.40845
	0.541078	0.57334
	0.528847	0.842367
	0.493251	0.64738
	0.489426	0.816671
	0.603135	0.659362
	0.534843	0.54414
	0.468826	0.669755
	0.45781	0.618769
	0.58508	0.666725
	0.524144	0.54736
	0.428139	0.609838
	0.431147	0.56702
	0.374634	0.568818
	0.454854	0.715735
	0.472479	0.67739
	0.689	0.700062
	0.491395	0.788133
	0.54194	0.786553
	0.435789	0.562612
	0.444564	0.637102
	0.416245	0.714874
	0.393119	0.663537
	0.458684	0.840505
	0.445749	0.67579
	0.393005	0.75983
	0.413221	0.715137
	0.379532	0.671655
	0.510527	0.525709
	0.523721	0.676215
	0.433797	0.519356
	0.594436	0.810435
	0.471474	0.801938
	0.486195	0.72165
	0.355286	0.772205
	0.45859	0.895215
	0.567926	0.637617
	0.660945	0.633876
	0.437035	0.676203
	0.621057	0.701235
	0.439989	0.659312
	0.419352	0.580793
	0.541504	0.642118
	0.455133	0.636206
	0.480789	0.79286
	0.456886	0.645865
	0.489963	0.659243
	0.507456	0.782966
	0.537217	0.579616
	0.345073	0.511208
	0.368039	0.853579
	0.424352	0.546796
	0.380821	0.797922
	0.728252	0.72171
	0.436192	1.01986
	0.488337	0.815725
	0.624362	0.663093
	0.483729	0.541738
	0.490738	0.685579
	0.44999	0.579426
	0.723029	0.525758
	0.435239	0.666175
	0.419996	0.990657
	0.377837	1.19911
	0.603928	0.687384
	0.562383	0.657821
	0.459484	0.645185
	0.413394	0.458287
	0.627527	0.497885
	0.457434	0.600863
	0.472693	0.770302
	0.410335	0.606492
	0.507101	0.584737
	0.413546	0.623564
	0.579296	0.732748
	0.464464	0.730275
	0.424024	0.717724
	0.395591	0.791162
	0.649738	0.760098
	0.368688	0.607312
	0.5	0.60993
	0.625679	0.554871
	0.451323	0.548136
	0.428316	0.635719
	0.374814	0.570994
	0.432401	0.866099
	0.426631	0.628839
	0.399436	0.512254
	0.420545	0.693654
	0.4664	0.683075
	0.443441	0.599017
	0.522437	0.829877
	0.471095	0.754278
	0.440717	0.524587
	0.586188	0.666143
	0.407574	0.648939
	0.833862	0.674666
	0.623771	0.783269
	0.505378	0.568231
	0.491141	0.730764
	0.523046	0.519764
	0.521221	0.525114
	0.665324	0.941466
	0.525987	0.675763
	0.444056	0.485356
	0.420923	0.698005
	0.502795	0.493946
	0.598232	0.5605
	0.486352	0.559698
	0.511029	0.709858
	0.554364	0.501904
	0.496234	0.823129
	0.463165	0.624059
	0.510297	0.627618
	0.475014	0.749981
	0.421892	0.588546
	0.44533	0.8408
	0.416758	0.566273
	0.572724	0.703989
	0.491585	0.767047
	0.45279	0.643502
	0.424467	0.789893
	0.491394	0.584348
	0.430694	0.714664
	0.571645	0.567741
	0.485704	0.660571
	0.59195	0.652211
	0.440173	0.682315
	0.442692	0.657204
	0.69425	0.54922
	0.512738	0.626866
	0.44524	0.547162
	0.469589	0.745238
	0.630839	0.441725
	0.438483	0.566135
	0.50063	0.654047
	0.505203	0.516325
	0.462733	0.529408
	0.503091	0.786192
	0.375515	0.593177
	0.501386	0.692027
	0.572055	0.446001
	0.432036	0.596758
	0.426164	0.928606
	0.3997	0.871659
	0.465782	0.929651
	0.503766	0.855504
	0.59019	1.04397
	0.609949	0.816031
	0.544757	0.913021
	0.460767	0.843901
	0.34609	0.907775
	0.381014	0.932194
	0.432845	0.89359
	0.534066	0.97075
	0.413635	0.922516
	0.592672	0.928933
	0.550658	0.766105
	0.368636	1.01551
	0.526612	0.933006
	0.363798	1.03451
	0.390492	0.850908
	0.373943	0.856677
	0.496376	0.888514
	0.513344	0.86718
	0.728849	0.856309
	0.505077	0.987799
	0.533062	0.889975
	0.472417	0.899494
	0.578526	0.845202
	0.496756	0.945738
	0.543214	0.969466
	0.539591	0.944235
	0.431081	1.01671
	0.456935	0.989284
	0.43302	0.912397
	0.454309	0.834169
	0.379821	0.880359
	0.53735	0.990242
	0.425491	0.91442
	0.39113	0.997799
	0.433276	1.0051
	0.467603	0.796827
	0.453478	0.882303
	0.53163	0.917961
	0.535258	0.967642
	0.404554	0.842804
	0.342005	0.882121
	0.353919	0.93759
	0.663696	0.910713
	0.438503	0.986177
	0.36138	1.00345
	0.448264	0.913611
	0.582488	0.773429
	0.637447	0.879344
	0.517415	0.817879
	0.372575	0.894427
	0.459784	0.705147
	0.344812	0.872223
	0.622213	0.974868
	0.469532	1.0129
	0.502695	0.952206
	0.452721	0.919862
	0.447989	0.896699
	0.449904	0.955584
	0.411558	0.901791
	0.376637	0.786622
	0.426066	0.792015
	0.427671	0.995403
	0.519492	0.833368
	0.321883	0.962251
	0.601469	0.887455
	0.438391	0.774424
	0.446106	0.835791
	0.386274	0.875527
	0.579336	0.862496
	0.430459	0.86971
	0.421904	0.898872
	0.467936	0.840209
	0.425278	0.943209
	0.394703	0.775725
	0.441087	1.00039
	0.437061	0.892032
	0.541217	0.786573
	0.435108	0.822249
	0.450142	0.839385
	0.531199	0.820233
	0.487877	0.769822
	0.372841	0.960139
	0.598008	0.804991
	0.425481	0.936922
	0.568958	0.862544
	0.417363	0.863936
	0.477092	0.901339
	0.411095	0.729669
	0.368403	0.872767
	0.514604	0.821112
	0.427354	0.977087
	0.489438	0.992921
	0.454567	0.803098
	0.46203	0.934082
	0.482135	0.801614
	0.491535	0.965706
	0.62252	1.05552
	0.453735	0.879646
	0.417149	0.923215
	0.455521	0.833105
	0.507675	0.84367
	0.407731	0.952096
	0.399572	0.856037
	0.420284	0.906751
	0.459977	0.860945
	0.54184	0.794952
	0.380015	0.861065
	0.37701	1.00896
	0.446112	0.74451
	0.437614	0.791941
	0.41925	0.88853
	0.41749	0.865329
	0.399705	0.870345
	0.366805	0.940254
	0.465423	0.81861
	0.451034	0.930354
	0.480124	0.87207
	0.431191	0.820875
	0.429953	0.779301
	0.346711	0.762328
	0.418162	0.839429
	0.489728	0.878075
	0.361145	0.863774
	0.453216	0.910905
	0.455971	0.899202
	0.549723	1.06112
	0.399095	0.989363
	0.465801	0.844439
	0.49977	0.937121
	0.528879	0.86392
	0.381133	0.926349
	0.474063	0.867434
	0.475106	0.815134
	0.45896	1.04666
	0.542249	0.99541
	0.578651	0.900123
	0.422814	0.894914
	0.408762	0.792794
	0.463263	1.06641
	0.396621	0.913688
	0.567669	0.922673
	0.432221	0.837683
	0.497979	0.969165
	0.52557	0.617444
	0.5046	0.570145
	0.531738	0.737547
	0.487708	0.688583
	0.521583	0.867233
	0.374017	0.751744
	0.50223	0.827571
	0.532369	0.5399
	0.627864	0.644322
	0.366511	0.781713
	0.45606	0.753091
	0.813556	0.919176
	0.368617	0.775324
	0.464919	0.726979
	0.42171	0.794355
	0.54437	0.831206
	0.447866	0.765224
	0.411792	0.553112
	0.448864	0.997827
	0.408899	0.626221
	0.503388	0.733998
	0.664483	0.719694
	0.409951	0.657236
	0.351906	0.866868
	0.50877	1.06702
	0.458244	0.71509
	0.385395	0.760796
	0.553972	0.652138
	0.495739	0.679608
	0.523717	0.810452
	0.438686	0.642032
	0.484128	0.657941
	0.632461	1.15416
	0.507738	0.875407
	0.447795	0.73339
	0.543042	0.982185
	0.398429	0.744325
	0.504579	0.87895
	0.473153	0.618479
	0.574414	0.585126
	0.371051	0.66681
	0.487384	0.571532
	0.521358	0.731871
	0.41224	1.15896
	0.499264	0.983182
	0.55227	0.856443
	0.414375	0.711545
	0.535632	0.679595
	0.452952	0.575557
	0.465263	0.750094
	0.468278	0.759301
	0.543862	0.769097
	0.525102	0.837134
	0.531653	0.638317
	0.430222	0.953366
	0.456765	0.883628
	0.528929	0.792602
	0.595742	0.822184
	0.423177	0.824404
	0.371296	0.771208
	0.393832	1.18286
	0.452165	0.75508
	0.513395	0.739012
	0.510803	0.771453
	0.461083	0.874732
	0.585366	0.865653
	0.499358	0.726913
	0.399718	0.837776
	0.534344	0.775265
	0.460354	0.719199
	0.683847	0.724388
	0.369262	1.36506
	0.433895	0.922127
	0.514131	0.791291
	0.38202	1.00557
	0.491533	0.666667
	0.614124	0.789771
	0.476639	0.799486
	0.500484	0.79798
	0.426273	0.803937
	0.35465	0.719749
	0.434092	0.831555
	0.503474	0.988302
	0.489935	0.889846
	0.756344	0.906687
	0.411663	0.986749
	0.528268	0.809507
	0.452137	0.896776
	0.484989	0.851748
	0.471586	0.974382
	0.502935	0.873447
	0.565369	0.912033
	0.564504	0.761376
	0.407228	0.828571
	0.499738	0.992163
	0.395116	0.769428
	0.643496	0.823133
	0.531138	0.835676
	0.503174	0.830769
	0.559455	0.686349
	0.586066	0.860215
	0.728075	0.707523
	0.84036	0.88532
	0.445151	0.885583
	0.388372	0.982322
	0.451764	0.756337
	0.390044	0.720117
	0.37302	0.741865
	0.385713	1.09502
	0.396693	0.94771
	0.548868	0.914527
	0.361662	0.949367
	0.570172	1.11364
	0.58577	0.806891
	0.418376	0.764886
	0.565379	0.714637
	0.48796	0.679813
	0.713214	0.840395
	0.384944	0.755772
	0.376084	0.803102
	0.651824	0.723077
	0.384965	0.721154
	0.425788	0.833122
	0.450052	0.737346
	0.886744	1.03019
	0.396174	0.86385
	0.487696	0.648179
	0.407605	0.765276
	0.304401	0.732295
	0.510169	0.822124
	0.359758	0.884163
	0.459219	1.20176
	0.490211	0.655373
	0.525997	1.2843
	0.424471	0.825858
	0.328842	1.02607
	0.453518	0.784866
	0.716454	0.761175
	0.444381	0.72357
	0.434659	0.854795
	0.394124	1.05287
	0.44503	0.83774
	0.637133	0.799353
	0.514775	0.828741
	0.371665	0.755188
	0.539643	0.908036
	0.544046	0.810657
	0.398102	0.908894
	0.628885	1.02081
	0.461961	0.773063
	0.439694	0.954479
	0.553022	0.813953
	0.840612	0.996071
	0.610249	0.656743
	0.447406	0.615949
	0.397964	0.946334
	0.661358	1.00196
	0.370543	0.781638
	0.50706	0.836566
	0.435296	0.759191
	0.660194	0.763398
	0.505037	0.812246
	0.524368	1.0787
	0.440899	0.942636
	0.539494	1.08166
	0.381972	1.13272
	0.466076	1.31399
	0.971583	0.899709
	0.46222	0.786178
	0.660986
	0.419551
	0.503408
	0.565663
	0.51403
	0.417544
	0.493567
	0.539886
	0.48514
	0.551195
	0.65328
	0.487875
	0.499424
	0.354995
	0.64756
	0.515584
	0.54841
	0.502522
	0.495601
	0.595275
	0.473171
	0.5292
	0.609683
	0.527051
	0.536107
	0.593294
	0.868445
	0.574497
	0.578428
	0.676421
	0.843608
	0.467529
	0.637237
	0.664391
	0.570842
	0.498873
	0.549532
	0.523409
	0.499696
	0.384934
	0.382412
	0.363694
	0.519943
	0.489417
	0.6755
	0.468498
	0.596106
	0.506425
	0.508792
	0.696859
	0.429015
	0.550685
	0.700069
	0.450407
	0.455585
	0.638989
	0.869144
	0.696149
	0.701777
	0.651674
	0.698714
	0.619048
	0.575765
	0.485439
	0.753203
	0.818558
	0.641238
	0.541167
	0.672709
	0.429107
	0.505233
	0.53247
	0.549482
	0.755285
	0.531798
	0.644681
	0.456402
	0.663372
	0.505821
	0.419735
	0.525618
	0.463434
	0.4457
	0.511971
	0.485809
	0.821547
	0.399653
	0.527914
	0.565245
	0.551268
	0.499144
	0.396519
	0.354304
	0.478623
	0.428307
	0.587134
	0.68938
	0.438026
	0.396376
	0.374453
	0.323757
