# Supplementary material for: Correct regionalization of a tissue primordium is essential for coordinated morphogenesis
Source: eLife journal article supplement (doi:10.7554/elife.72369), 2021-11-01
Supplement: supp [file elife_poa_e72369_Figure_7_source_data_1.xlsx]

## Sheet:  C
Figure 7C	Cumulative relative frequency of cell area
		Apical area (bin centre)	wild-type	UAS-Fog
		4	0.0116732	0.0901015
		6	0.0687419	0.19797
		8	0.162127	0.356599
		10	0.277562	0.497462
		12	0.442283	0.615482
		14	0.559014	0.722081
		16	0.679637	0.798223
		18	0.771725	0.851523
		20	0.831388	0.909898
		22	0.879377	0.932741
		24	0.916991	0.953046
		26	0.949416	0.969543
		28	0.963684	0.983503
		30	0.980545	0.993655
		32	0.985733	0.994924
		34	0.994812	0.997462
		36	0.996109	1
		38	0.998703	1
		40	1	1

## Sheet:  C dash
Figure 7C'	Histogram of the frequency distribution of cell area
		Apical area (bin centre)	wild-type	UAS-Fog
		3	0	0.0190355
		4	0.0077821	0.0406091
		5	0.0168612	0.0647208
		6	0.0311284	0.0444162
		7	0.0298314	0.0786802
		8	0.0531777	0.0774112
		9	0.0415045	0.0672589
		10	0.0596628	0.0583756
		11	0.0843061	0.0850254
		12	0.076524	0.0482234
		13	0.0726329	0.0621827
		14	0.0505837	0.0520305
		15	0.0609598	0.0444162
		16	0.0726329	0.0317259
		17	0.0479896	0.0456853
		18	0.0466926	0.0228426
		19	0.0402075	0.0241117
		20	0.0246433	0.0304569
		21	0.0298314	0.0177665
		22	0.0233463	0.00507614
		23	0.0181582	0.0152284
		24	0.0168612	0.0152284
		25	0.0233463	0.00634518
		26	0.0116732	0.00888325
		27	0.0142672	0.00507614
		28	0.00389105	0.00888325
		29	0.0077821	0.00888325
		30	0.00907912	0.00507614
		31	0.00518807	0
		32	0.00389105	0.00126904
		33	0.00259403	0
		34	0.00259403	0.00253807
		35	0.00518807	0
		36	0.00129702	0.00126904
		37	0	0.00126904
		38	0.00259403	0
		39	0.00129702	0

## Sheet: J
Figure 7J	Lumen aspect ratio
		wild-type	UAS-Fog
		1.2766	1.26718
		1.43601	5.19444
		1.27021	4.87591
		1.28226	3.66097
		1.14823	3.27313
		1.14573	2.72619
		1.07946	4.30216
		1.27059	1.48111
		1.02754	2.86441
		1.28635	4.3199
		1.16667	2.56577
		1.06509	2.57008
		1.14014	2.64201
		1.15168	1.69284
		1.06723	3.4781
		1.2963	3.96279
		1.13882	4.78431
		1.10405	3.27143
		1.14348	1.63043
		1.06577	2.0726
		1.33579
		1.25345
		1.08957

## Sheet: N
Figure 7N	Theoretical number of cells in different coronae
		WT
		corona of neigh 1	corona of neigh 2	corona of neigh 3	corona of neigh 4	corona of neigh 5	corona of neigh 6
		8	8	11	12	13	14
		Central pit
		corona of neigh 1	corona of neigh 2	corona of neigh 3	corona of neigh 4	corona of neigh 5
		12	18	14	30	36
		Enlarged pit
		corona of neigh 1	corona of neigh 2	corona of neigh 3	corona of neigh 4
		19	19	20	21

## Sheet: O
	Figure 7P
Figure 7O	Number of cells in different coronae
		WT
		corona of neigh 1	corona of neigh 2	corona of neigh 3	corona of neigh 4	corona of neigh 5	corona of neigh 6
	Mean	11.0909	16.3636	22.2727	27.7273	29.1111	34
	Standar dev	1.6404	1.62928	2.28433	2.37027	2.31541	3
		hkb
		corona of neigh 1	corona of neigh 2	corona of neigh 3	corona of neigh 4	corona of neigh 5	corona of neigh 6
	Mean	11.0909	16.3636	22.2727	27.7273	29.1111	34
	Standar dev	1.6404	1.62928	2.28433	2.37027	2.31541	3
		UAS-Fog
		corona of neigh 1	corona of neigh 2
	Mean	19.6	21.8
	Standar dev	6.22896	6.97854
